# Supplementary material for: Genetic determinants of anti-malarial acquired immunity in a large multi-centre study
Source: Springer Nature journal article supplement (doi:10.1186/s12936-015-0833-x), 2015-08-27
Supplement: MOESM1 [file 9761536]

## **ADDITIONAL FILE 1: SUPPLEMENTARY TABLES**

### **Genetic Determinants Of Anti-Malarial Acquired Immunity In A Large Multi-Centre Study**

Jennifer M.G. Shelton, Patrick Corran, Paul Risley, Nilupa Silva, Christina Hubbart, Anna Jeffreys, Kate Rowlands, Rachel Craik, Victoria Cornelius, Meike Hensmann, Sile Molloy, Nuno Sepulveda, Taane G. Clark, Gavin Band, Geraldine M. Clarke, Christopher C.A. Spencer, Angeliki Kerasidou, Susana Campino, Sarah Auburn, Adama Tall, Alioune Badara Ly, Odile Mercereau-Puijalon, Anavaj Sakuntabhai, Abdoulaye Djimde, Boubacar Maiga, Ousmane Toure, Ogobara Doumbo, Amagana Dolo, Marita Troye-Blomberg, Valentina D. Mangano, Frederica Verra, David Modiano, Edith Bougouma, Sodiomon B. Sirima, Muntaser Ibrahim, Ayman Hussain, Nahid Eid, Abier Elzein, Hiba Mohamed, Ahmed Elhassan, Ibrahim Elhassan, Thomas N. Williams, Carolyne Ndila, Alexander Macharia, Kevin Marsh, Alphaxard Manjurano, Hugh Reyburn, Martha Lemnge, Deus Ishengoma, Richard Carter, Nadira Karunaweera, Deepika Fernando, Rajika Dewasurendra, Christopher J. Drakeley, Eleanor M. Riley, Dominic P. Kwiatkowski, and Kirk A. Rockett, in collaboration with the MalariaGEN Consortium,

Corresponding authors Kirk A. Rockett and Dominic P. Kwiatkowski  
Wellcome Trust Centre for Human Genetics, University of Oxford, Roosevelt Drive, Oxford, UK

This file contains **Additional Table ST1**: Details of Principal Investigators and Ethics Review Committees for each site.

**Additional Table ST1:** Details of Principal Investigators and Ethics Review Committees for each site.

| Country                     | ISO country code | Principal Investigator                       | Ethics Committee                                                            | Institution                                                                                                           | Study identifier                | Study description                                                                                                                                                                                                                                                                             |
|-----------------------------|------------------|----------------------------------------------|-----------------------------------------------------------------------------|-----------------------------------------------------------------------------------------------------------------------|---------------------------------|-----------------------------------------------------------------------------------------------------------------------------------------------------------------------------------------------------------------------------------------------------------------------------------------------|
| <i>Senegal</i>              | SN               | Dr A. Tall                                   | Direction de la Sante, Ministere de la Sante et de la Prevention Medicale   | Unité d'épidémiologie, Institut Pasteur-Dakar                                                                         | No. 1971/MSPM/DS/DER            | Longitudinal survey with active case detection during transmission seasons of 2006/2007.                                                                                                                                                                                                      |
| <i>Mali</i>                 | ML               | Dr A. Djimé                                  | Comité d'Ethique, Faculte de Medicine de Pharmacie et d'Odonto-Stomatologie | Centre de Recherche et de Formation sur le Paludisme, Département d'Epidémiologie des Affections Parasitaires, Bamako | No. 25/FMPOS                    | Two sites conducted studies in 2006/2007. Manteorou conducted three cross-sectional studies during the transmission seasons of 2006/2007 and the intermittent dry season. Pongonon conducted a cross-sectional and a chloroquine efficacy study during the transmission seasons of 2006/2007. |
| <i>Burkina Faso</i>         | BF               | Dr S. B. Sirima                              | Comite d'Ethique pour la Recherche en Sante, Ministere de la Sante          | Centre National de Recherché et de Formation sur le Paludisme                                                         | No. 2007-048                    | Five cross-sectional studies during two consecutive rainy seasons (2007/2008) and the intermittent dry season.                                                                                                                                                                                |
| <i>Sudan</i>                | SD               | Professor M. E. Ibrahim                      | Ethics Committee, Institute of Endemic Diseases, University of Khartoum     | Institute of Endemic Diseases, University of Khartoum                                                                 | IEND/07/04                      | Longitudinal studies during transmission seasons of 2007/2008, and cross-sectional surveys before and after each season, as well as in the intermittent dry season.                                                                                                                           |
| <i>Kenya</i>                | KE               | Professor T. N. Williams                     | KEMRI/ National Ethics Review Committee                                     | Kenya Medical Research Institute                                                                                      | KEMRI/RES/7/3/1<br>SSC NO. 1484 | Birth cohort study; longitudinal data provided from birth (1992-1995) until sample date ~7 years later.                                                                                                                                                                                       |
| <i>Tanzania (Moshi)</i>     | TZ               | Professor C. Drakeley/<br>Professor E. Riley | Research Ethics Committee KCMC/<br>Ethics Committee LSHTM                   | Tumaini University, Kilimanjaro Christian Medical College/<br>London School of Hygiene & Tropical Medicine            | - / 4093                        | Two cross-sectional surveys: one during the short rains in 2001 and one during the long rains in 2002.                                                                                                                                                                                        |
| <i>Tanzania (Tanga SP1)</i> | TZ               | Dr M. Lemnge                                 | Medical Research Coordinating Committee NIMR                                | National Institute for Medical Research, Dar as Salaam                                                                | NIMR/HQ/R.8a/VOI.IX/529         | Cross-sectional studies at the end of two consecutive rainy seasons (2006/2007).                                                                                                                                                                                                              |
| <i>Tanzania (Tanga SP2)</i> | TZ               | Dr M. Lemnge                                 | Medical Research Coordinating Committee NIMR                                | National Institute for Medical Research, Dar as Salaam                                                                | NIMR/HQ/R.8a/VOI.IX/529         | Cross-sectional survey at the end of the long rainy season of 2004.                                                                                                                                                                                                                           |
| <i>Sri Lanka</i>            | LK               | Professor N. D. Karunweera                   | Ethical Review Committee, Faculty of Medicine, University of Colombo        | Department of Parasitology, Faculty of Medicine, University of Colombo                                                | EC/06/044                       | Cohort study with active case detective during 1992/1993; follow-up in 2006/2007 to collect samples.                                                                                                                                                                                          |
