# Supplementary material for: Genetic determinants of anti-malarial acquired immunity in a large multi-centre study
Source: Springer Nature journal article supplement (doi:10.1186/s12936-015-0833-x), 2015-08-27
Supplement: MOESM3 [file 9761536]

### **ADDITIONAL FILE 3: LARGE FORMAT SUPPLEMENTARY TABLES**

#### **Genetic Determinants Of Anti-Malarial Acquired Immunity In A Large Multi-Centre Study**

Jennifer M.G. Shelton, Patrick Corran, Paul Risley, Nilupa Silva, Christina Hubbart, Anna Jeffreys, Kate Rowlands, Rachel Craik, Victoria Cornelius, Meike Hensmann, Sile Molloy, Nuno Sepulveda, Taane G. Clark, Gavin Band, Geraldine M. Clarke, Christopher C.A. Spencer, Angeliki Kerasidou, Susana Campino, Sarah Auburn, Adama Tall, Alioune Badara Ly, Odile Mercereau-Puijalon, Anavaj Sakuntabhai, Abdoulaye Djimde, Boubacar Maiga, Ousmane Toure, Ogobara Doumbo, Amagana Dolo, Marita Troye-Blomberg, Valentina D. Mangano, Frederica Verra, David Modiano, Edith Bougouma, Sodiomon B. Sirima, Muntaser Ibrahim, Ayman Hussain, Nahid Eid, Abier Elzein, Hiba Mohamed, Ahmed Elhassan, Ibrahim Elhassan, Thomas N. Williams, Carolyne Ndila, Alexander Macharia, Kevin Marsh, Alphaxard Manjurano, Hugh Reyburn, Martha Lemnge, Deus Ishengoma, Richard Carter, Nadira Karunaweera, Deepika Fernando, Rajika Dewasurendra, Christopher J. Drakeley, Eleanor M. Riley, Dominic P. Kwiatkowski, and Kirk A. Rockett, in collaboration with the MalariaGEN Consortium,

Corresponding authors Kirk A. Rockett and Dominic P. Kwiatkowski  
Wellcome Trust Centre for Human Genetics, University of Oxford, Roosevelt Drive, Oxford, UK

This file contains:

**Additional File LFST1A:** Details of gene regions selected for genotyping. Gene positions are with respect to Ensembl Release 75 and human genome build GRCh37(<http://feb2014.archive.ensembl.org/index.html>)

**Additional File LFST1B:** Details of the SNP assays and multiplexes (SNP groups) designed for the Sequenom (Agena Bioscience; <http://agenabio.com/iplx-genotyping>) iPLEX platform. Each multiplex is highlighted by colour and are separated by blank rows. SNPs are ordered according to multiplex and the universal extension primer (UEP) mass (Daltons). Headings with an orange background provide details of each SNP in the human genome, while headings with a grey background are part of the assay design file. Further details of the assay design file specification can be obtained from Sequenom (Agena Bioscience).

| HUGO gene symbol | synonym   | Gene name/details                                                                                                                                        | gene transcription strand | chr | gene_region         | SNPs per gene <sup>a</sup> |                   |                | Core MalariaGEN gens/SNPs <sup>b</sup> | Notes/ key reference                   |
|------------------|-----------|----------------------------------------------------------------------------------------------------------------------------------------------------------|---------------------------|-----|---------------------|----------------------------|-------------------|----------------|----------------------------------------|----------------------------------------|
|                  |           |                                                                                                                                                          |                           |     |                     | Initial 202 SNPs           | Analysis 196 SNPs | Final 178 SNPs |                                        |                                        |
| GBP7             |           | guanylate binding protein 7 [Source:HGNC Symbol;Acc:29606]                                                                                               | -1                        | 1   | 89597434-89641723   | 1                          | 1                 | 1              | GBP7                                   | 1                                      |
| DARC             | duffy     | Duffy blood group, atypical chemokine receptor [Source:HGNC Symbol;Acc:4035]                                                                             | 1                         | 1   | 159173097-159176290 | 1                          | 1                 | 1              | DARC                                   | 1                                      |
| FCER1A           |           | Fc fragment of IgE, high affinity I, receptor for; alpha polypeptide [Source:HGNC Symbol;Acc:3609]                                                       | 1                         | 1   | 159259504-159278014 | 1                          | 1                 | 1              |                                        | Antibody receptor                      |
| FCGR2A           |           | Fc fragment of IgG, low affinity IIA, receptor (CD32) [Source:HGNC Symbol;Acc:3616]                                                                      | 1                         | 1   | 161475220-161493803 | 1                          | 1                 | 1              |                                        | Antibody receptor                      |
| FCGR3B           | CD16      | Fc fragment of IgG, low affinity IIIb, receptor (CD16b) [Source:HGNC Symbol;Acc:3620]                                                                    | -1                        | 1   | 161592986-161601753 | 1                          | 1                 | 1              |                                        | Antibody receptor                      |
| RG52             |           | regulator of G-protein signaling 2, 24kDa [Source:HGNC Symbol;Acc:9998]                                                                                  | 1                         | 1   | 192778169-192781403 | 1                          | 0                 | 0              |                                        | G-protein signalling                   |
| IL10             |           | interleukin 10 [Source:HGNC Symbol;Acc:5962]                                                                                                             | -1                        | 1   | 206940947-206945839 | 6                          | 6                 | 6              | IL10                                   | 1                                      |
| CR1              |           | complement component (3b/4b) receptor 1 (Knops blood group) [Source:HGNC Symbol;Acc:2334]                                                                | 1                         | 1   | 207669492-207813992 | 2                          | 2                 | 2              | CR1                                    | 1                                      |
| IL1A             |           | interleukin 1, alpha [Source:HGNC Symbol;Acc:5991]                                                                                                       | -1                        | 2   | 113531492-113542167 | 2                          | 2                 | 2              | IL1A                                   | 1                                      |
| IL1B             |           | interleukin 1, beta [Source:HGNC Symbol;Acc:5992]                                                                                                        | -1                        | 2   | 113587328-113594480 | 1                          | 1                 | 1              | IL1B                                   | 1                                      |
| IL17RE           |           | interleukin 17 receptor E [Source:HGNC Symbol;Acc:18439]                                                                                                 | 1                         | 3   | 9944296-9958086     | 1                          | 1                 | 1              | IL17RE                                 | 1                                      |
| TLR9             |           | tol-like receptor 9 [Source:HGNC Symbol;Acc:15633]                                                                                                       | -1                        | 3   | 52255096-52273183   | 2                          | 2                 | 2              | TLR9                                   | 1                                      |
| IL17RD           |           | interleukin 17 receptor D [Source:HGNC Symbol;Acc:17616]                                                                                                 | -1                        | 3   | 57124010-57204334   | 1                          | 1                 | 1              | IL17RD                                 | 1                                      |
| TLR1             |           | tol-like receptor 1 [Source:HGNC Symbol;Acc:11847]                                                                                                       | -1                        | 4   | 38792298-38858438   | 2                          | 2                 | 2              | TLR1                                   | 1                                      |
| TLR6             |           | tol-like receptor 6 [Source:HGNC Symbol;Acc:16711]                                                                                                       | -1                        | 4   | 38825336-38858438   | 2                          | 2                 | 2              | TLR6                                   | 1                                      |
| IL8              |           | interleukin 8 [Source:HGNC Symbol;Acc:6025]                                                                                                              | 1                         | 4   | 74606223-74609433   | 1                          | 1                 | 1              |                                        | cytokine                               |
| IL7R             |           | interleukin 7 receptor [Source:HGNC Symbol;Acc:6024]                                                                                                     | 1                         | 5   | 35852797-35879705   | 2                          | 2                 | 2              |                                        | cytokine                               |
| C6               |           | complement component 6 [Source:HGNC Symbol;Acc:1339]                                                                                                     | -1                        | 5   | 41142336-41261540   | 1                          | 1                 | 1              | C6                                     | 1                                      |
| TSLP             |           | thymic stromal lymphopoietin [Source:HGNC Symbol;Acc:30743]                                                                                              | 1                         | 5   | 110405760-110413722 | 1                          | 1                 | 1              |                                        |                                        |
| IL3              |           | interleukin 3 (colony-stimulating factor, multiple) [Source:HGNC Symbol;Acc:6011]                                                                        | 1                         | 5   | 131396222-131398897 | 7                          | 7                 | 6              |                                        | 2                                      |
| CSF2             |           | colony stimulating factor 2 (granulocyte-macrophage) [Source:HGNC Symbol;Acc:2434]                                                                       | 1                         | 5   | 131409483-131411859 | 5                          | 5                 | 4              |                                        | 2                                      |
| P4HA2            |           | prolyl 4-hydroxylase, alpha polypeptide II [Source:HGNC Symbol;Acc:8547]                                                                                 | -1                        | 5   | 131527531-131631008 | 4                          | 4                 | 4              |                                        | 2                                      |
| PDLIM4           |           | PDZ and LIM domain 4 [Source:HGNC Symbol;Acc:16501]                                                                                                      | 1                         | 5   | 131593364-131609147 | 4                          | 4                 | 3              |                                        | 2                                      |
| SLC22A4          |           | solute carrier family 22 (organic cation/zwitterion transporter), member 4 [Source:HGNC Symbol;Acc:10968]                                                | 1                         | 5   | 131630136-131679899 | 8                          | 8                 | 5              |                                        | 2                                      |
| SLC22A5          |           | solute carrier family 22 (organic cation/carnitine transporter), member 5 [Source:HGNC Symbol;Acc:10969]                                                 | 1                         | 5   | 131705444-131731306 | 4                          | 4                 | 2              |                                        | 2                                      |
| C5orf56          | LOC441108 | chromosome 5 open reading frame 56 [Source:HGNC Symbol;Acc:33838]                                                                                        | 1                         | 5   | 131746328-131811736 | 5                          | 5                 | 5              |                                        | 2                                      |
| IRF1             |           | interferon regulatory factor 1 [Source:HGNC Symbol;Acc:6116]                                                                                             | -1                        | 5   | 131817301-131826490 | 5                          | 5                 | 5              | IRF1                                   | 1,2                                    |
| IL5              |           | interleukin 5 (colony-stimulating factor, eosinophil) [Source:HGNC Symbol;Acc:6016]                                                                      | -1                        | 5   | 131877136-131892530 | 3                          | 3                 | 2              |                                        | 2                                      |
| RAD50            |           | RAD50 homolog (S. cerevisiae) [Source:HGNC Symbol;Acc:9816]                                                                                              | 1                         | 5   | 131891711-131980313 | 17                         | 17                | 9              |                                        | 2                                      |
| IL13             |           | interleukin 13 [Source:HGNC Symbol;Acc:5973]                                                                                                             | 1                         | 5   | 131991955-131996802 | 5                          | 5                 | 5              | IL13                                   | 1,2                                    |
| IL4              |           | interleukin 4 [Source:HGNC Symbol;Acc:6014]                                                                                                              | 1                         | 5   | 132009678-132018368 | 6                          | 6                 | 6              | IL4                                    | 1,2                                    |
| IL12B            |           | interleukin 12B (natural killer cell stimulatory factor 2, cytotoxic lymphocyte maturation factor 2, p40) [Source:HGNC Symbol;Acc:5970]                  | -1                        | 5   | 158741791-158757895 | 4                          | 4                 | 4              |                                        | cytokine                               |
| LTA              |           | lymphotoxin alpha [Source:HGNC Symbol;Acc:6709]                                                                                                          | 1                         | 6   | 31527243-31529513   | 2                          | 2                 | 2              | LTA                                    | 1                                      |
| TNF              |           | tumor necrosis factor [Source:HGNC Symbol;Acc:11892]                                                                                                     | 1                         | 6   | 31555632-31557434   | 5                          | 5                 | 5              | TNF                                    | 1                                      |
| SLC44A4          | CTL4      | solute carrier family 44, member 4 [Source:HGNC Symbol;Acc:13941]                                                                                        | -1                        | 6   | 31870631-31870874   | 1                          | 1                 | 1              | CTL4                                   | 1                                      |
| IL20RA           |           | interleukin 20 receptor, alpha [Source:HGNC Symbol;Acc:6003]                                                                                             | -1                        | 6   | 137321108-137366298 | 1                          | 1                 | 1              | IL20RA                                 | 1                                      |
| IFNGR1           |           | interferon gamma receptor 1 [Source:HGNC Symbol;Acc:5439]                                                                                                | -1                        | 6   | 137518621-137540586 | 1                          | 1                 | 1              |                                        | cytokine receptor                      |
| NOD1             |           | nucleotide-binding oligomerization domain containing 1 [Source:HGNC Symbol;Acc:16390]                                                                    | -1                        | 7   | 30464143-30518400   | 1                          | 1                 | 1              | NOD1                                   | 1                                      |
| GLI3             |           | GLI family zinc finger 3 [Source:HGNC Symbol;Acc:4319]                                                                                                   | -1                        | 7   | 42000548-42277469   | 1                          | 1                 | 1              |                                        |                                        |
| HECW1-IT1        | HECW      | HECW1 intronic transcript 1 (non-protein coding) [Source:HGNC Symbol;Acc:41465]                                                                          | 1                         | 7   | 43157495-43202786   | 2                          | 2                 | 2              |                                        |                                        |
| IKZF1            |           | IKAROS family zinc finger 1 (Ikaros) [Source:HGNC Symbol;Acc:13176]                                                                                      | 1                         | 7   | 50343720-50472799   | 7                          | 6                 | 6              |                                        | 3                                      |
| DDC              |           | dopa decarboxylase (aromatic L-amino acid decarboxylase) [Source:HGNC Symbol;Acc:2719]                                                                   | -1                        | 7   | 50526134-50633154   | 24                         | 24                | 24             |                                        | 3                                      |
| CD36             |           | CD36 molecule (thrombospondin receptor) [Source:HGNC Symbol;Acc:1663]                                                                                    | 1                         | 7   | 79988891-80308593   | 2                          | 2                 | 2              | CD36                                   | 1                                      |
| CFTR             |           | cystic fibrosis transmembrane conductance regulator (ATP-binding cassette sub-family C, member 7) [Source:HGNC Symbol;Acc:1884]                          | 1                         | 7   | 117105838-117356025 | 1                          | 1                 | 1              | CFTR                                   | 1                                      |
| TLR4             |           | tol-like receptor 4 [Source:HGNC Symbol;Acc:11850]                                                                                                       | 1                         | 9   | 120466610-120479149 | 2                          | 2                 | 2              | TLR4                                   | 1                                      |
| ABO              |           | ABO blood group (transferase A, alpha 1-3-N-acetylgalactosaminyltransferase; transferase B, alpha 1-3-galactosyltransferase) [Source:HGNC Symbol;Acc:79] | -1                        | 9   | 136125788-136150617 | 2                          | 2                 | 2              | ABO                                    | 1                                      |
| HBB              |           | hemoglobin, beta [Source:HGNC Symbol;Acc:4827]                                                                                                           | -1                        | 11  | 5246694-5250625     | 3                          | 3                 | 2              | HBB                                    | 1                                      |
| TRIM5            |           | tripartite motif containing 5 [Source:HGNC Symbol;Acc:16276]                                                                                             | -1                        | 11  | 5684425-5959849     | 1                          | 1                 | 1              | TRIM5                                  | 1                                      |
| MS4A2            |           | membrane-spanning 4-domains, subfamily A, member 2 [Source:HGNC Symbol;Acc:7316]                                                                         | 1                         | 11  | 59855734-59863444   | 1                          | 1                 | 1              |                                        |                                        |
| RTN3             |           | reticulon 3 [Source:HGNC Symbol;Acc:10469]                                                                                                               | 1                         | 11  | 63448918-63527363   | 1                          | 1                 | 1              | RTN3                                   | 1                                      |
| STAT6            |           | signal transducer and activator of transcription 6, interleukin-4 induced [Source:HGNC Symbol;Acc:11368]                                                 | -1                        | 12  | 57489191-57525922   | 5                          | 5                 | 5              |                                        | IL4 inducer                            |
| IFNG             |           | interferon, gamma [Source:HGNC Symbol;Acc:5438]                                                                                                          | -1                        | 12  | 68548548-68553527   | 5                          | 5                 | 5              |                                        | cytokine                               |
| IL22             |           | interleukin 22 [Source:HGNC Symbol;Acc:14900]                                                                                                            | -1                        | 12  | 68642022-68647387   | 5                          | 5                 | 5              | IL22                                   | 1                                      |
| SPTB             |           | spectrin, beta, erythrocytic [Source:HGNC Symbol;Acc:11274]                                                                                              | -1                        | 14  | 65213002-65346601   | 1                          | 1                 | 1              | SPTB                                   | 1                                      |
| ADCY9            |           | adenylate cyclase 9 [Source:HGNC Symbol;Acc:240]                                                                                                         | -1                        | 16  | 4003388-4166186     | 2                          | 2                 | 2              | ADCY9                                  | 1                                      |
| IL4R             |           | interleukin 4 receptor [Source:HGNC Symbol;Acc:6015]                                                                                                     | 1                         | 16  | 27324989-27376099   | 1                          | 1                 | 1              | IL4R                                   | 1                                      |
| HP               |           | haptoglobin [Source:HGNC Symbol;Acc:5141]                                                                                                                | 1                         | 16  | 72088491-72094954   | 1                          | 1                 | 1              |                                        | Haptoglobin                            |
| ADORA2B          |           | adenosine A2b receptor [Source:HGNC Symbol;Acc:264]                                                                                                      | 1                         | 17  | 15848231-15879060   | 1                          | 1                 | 1              | ADORA2B                                | 1                                      |
| NOS2             |           | nitric oxide synthase 2, inducible [Source:HGNC Symbol;Acc:7873]                                                                                         | -1                        | 17  | 26083792-26127525   | 5                          | 5                 | 5              | NOS2                                   | 1                                      |
| EMR1             |           | egf-like module containing, mucin-like, hormone receptor-like 1 [Source:HGNC Symbol;Acc:3336]                                                            | 1                         | 19  | 6887577-6940470     | 2                          | 2                 | 2              | EMR1                                   | 1                                      |
| FCER2            |           | Fc fragment of IgE, low affinity II, receptor for (CD23) [Source:HGNC Symbol;Acc:3612]                                                                   | -1                        | 19  | 7753644-7767032     | 1                          | 1                 | 1              |                                        | Antibody receptor                      |
| ICAM1            |           | intercellular adhesion molecule 1 [Source:HGNC Symbol;Acc:5344]                                                                                          | 1                         | 19  | 10381511-10397291   | 2                          | 2                 | 2              | ICAM1                                  | 1                                      |
| GNAS             |           | GNAS complex locus [Source:HGNC Symbol;Acc:4392]                                                                                                         | 1                         | 20  | 57414773-57486247   | 2                          | 1                 | 1              | GNAS                                   | 1                                      |
| DERL3            |           | derlin 3 [Source:HGNC Symbol;Acc:14236]                                                                                                                  | -1                        | 22  | 24176690-24181315   | 1                          | 1                 | 1              | DERL3                                  | 1                                      |
| AMELX            |           | amelogenin, X-linked [Source:HGNC Symbol;Acc:461]                                                                                                        | 1                         | X   | 11311533-11318881   | 3                          | 0                 | 0              | AMELX                                  | 1, used for determining genetic gender |

**Additional File LFST1A:** Details of gene regions selected for genotyping. Gene positions are with respect to Ensembl Release 75 and human genome build GRCh37(<http://feb2014.archive.ensembl.org/index.html>)

<sup>a</sup>: SNP multiplexes can be found in Table 2 below

<sup>b</sup>: A description of the selection and analysis of these SNPs in severe malaria can be found in reference 1.

Further details of the associations with malaria can be found here or from references cited in the main text:

**1:** Malaria Genomic Epidemiology Network. (2014) Reappraisal of known malaria resistance loci in a large multicenter study. *Nat Genet.* **46:1197-204.** (<http://www.ncbi.nlm.nih.gov/pubmed/25261933>)

**2:** Rihet P1, Traoré Y, Abel L, Aucan C, Traoré-Leroux T, Fumoux F. (1998) Malaria in humans: Plasmodium falciparum blood infection levels are linked to chromosome 5q31-q33. *Am. J. Hum. Genet.* **63:498-505.** (<http://www.ncbi.nlm.nih.gov/pubmed/9683598>)

**3:** Jallow M, et al. (2008) Genome-wide and fine-resolution association analysis of malaria in West Africa. *Nat Genet.* **41:657-65.** (<http://www.ncbi.nlm.nih.gov/pubmed/19465909>)
