# Supplementary material for: Genetic determinants of anti-malarial acquired immunity in a large multi-centre study
Source: Springer Nature journal article supplement (doi:10.1186/s12936-015-0833-x), 2015-08-27
Supplement: MOESM7 [file 9761536]

## ADDITIONAL FILE 7: SUPPLEMENTARY TABLES

### Genetic Determinants Of Anti-Malarial Acquired Immunity In A Large Multi-Centre Study

Jennifer M.G. Shelton, Patrick Corran, Paul Risley, Nilupa Silva, Christina Hubbart, Anna Jeffreys, Kate Rowlands, Rachel Craik, Victoria Cornelius, Meike Hensmann, Sile Molloy, Nuno Sepulveda, Taane G. Clark, Gavin Band, Geraldine M. Clarke, Christopher C.A. Spencer, Angeliki Kerasidou, Susana Campino, Sarah Auburn, Adama Tall, Alioune Badara Ly, Odile Mercereau-Puijalon, Anavaj Sakuntabhai, Abdoulaye Djimde, Boubacar Maiga, Ousmane Toure, Ogobara Doumbo, Amagana Dolo, Marita Troye-Blomberg, Valentina D. Mangano, Frederica Verra, David Modiano, Edith Bougouma, Sodiomon B. Sirima, Muntaser Ibrahim, Ayman Hussain, Nahid Eid, Abier Elzein, Hiba Mohamed, Ahmed Elhassan, Ibrahim Elhassan, Thomas N. Williams, Carolyn Ndila, Alexander Macharia, Kevin Marsh, Alphaxard Manjurano, Hugh Reyburn, Martha Lemnge, Deus Ishengoma, Richard Carter, Nadira Karunaweera, Deepika Fernando, Rajika Dewasurendra, Christopher J. Drakeley, Eleanor M. Riley, Dominic P. Kwiatkowski, and Kirk A. Rockett, in collaboration with the MalariaGEN Consortium,

Corresponding authors Kirk A. Rockett and Dominic P. Kwiatkowski  
Wellcome Trust Centre for Human Genetics, University of Oxford, Roosevelt Drive, Oxford, UK

This file contains:

**Additional Table ST3A: Details of linear regression models used to investigate effect of non-genetic factors on logged antibody levels.** All covariates were categorical except for parasite density, which was continuous.

**Additional Table ST3B: Details of site-specific linear regression models used to investigate SNP-antibody associations.** Models were formulated for each site separately based on data collected by site. Models were run for each SNP-antibody combination separately using four genetic models (additive, dominant, heterozygote and recessive) and results were combined using meta-analysis to give an overall beta and p-value for SNP effect. All covariates were categorical.

**Additional Table ST3C: Details of logistic regression model used to investigate effect of SNPs with significant SNP-antibody associations on malaria infection.** All covariates were categorical.

**Additional Table ST3D: Details of linear regression model used to investigate effect of SNPs with significant SNP-antibody associations on parasite density.** All covariates were categorical except for parasite density, which was continuous.

**Additional Table ST3A: Details of linear regression models used to investigate effect of non-genetic factors on logged antibody levels.** All covariates were categorical except for parasite density, which was continuous.

| Regression model type | Data used                     | Outcome         | Full model                                                                                                                                                                                         |
|-----------------------|-------------------------------|-----------------|----------------------------------------------------------------------------------------------------------------------------------------------------------------------------------------------------|
| Linear                | <i>All data</i>               | antibody levels | $\beta_1\text{age} + \beta_2\text{gender} + \beta_3\text{malaria status} + \beta_4\text{ethnicity} + \beta_5\text{village} + \beta_6\text{month} + \beta_7\text{study}$                            |
|                       | <i>BJ, KM, TG, TP, SL</i>     | antibody levels | $\beta_1\text{age} + \beta_2\text{gender} + \beta_3\text{malaria status} + \beta_4\text{ethnicity} + \beta_5\text{village} + \beta_6\text{month} + \beta_7\text{study} + \beta_8\text{bednet use}$ |
|                       | <i>DP, DQ, BJ, TN, TG, TP</i> | antibody levels | $\beta_1\text{age} + \beta_2\text{gender} + \beta_4\text{ethnicity} + \beta_5\text{village} + \beta_6\text{month} + \beta_7\text{study} + \beta_8\text{parasite density}$                          |

**Additional Table ST3B: Details of site-specific linear regression models used to investigate SNP-antibody associations.** Models were formulated for each site separately based on data collected by site. Models were run for each SNP-antibody combination separately using four genetic models (additive, dominant, heterozygote and recessive) and results were combined using meta-analysis to give an overall beta and p-value for SNP effect. All covariates were categorical.

| Regression model type | Data used       | Outcome                                                                                                                                     | Full model                                                                                                                                                            |
|-----------------------|-----------------|---------------------------------------------------------------------------------------------------------------------------------------------|-----------------------------------------------------------------------------------------------------------------------------------------------------------------------|
| Linear                | <i>SE</i>       | antibody levels                                                                                                                             | $\beta_1\text{SNP} + \beta_2\text{age} + \beta_3\text{gender} + \beta_4\text{ethnicity} + \beta_5\text{village}$                                                      |
|                       | <i>DP</i>       | antibody levels                                                                                                                             | $\beta_1\text{SNP} + \beta_2\text{age} + \beta_3\text{gender} + \beta_4\text{ethnicity} + \beta_5\text{village} + \beta_6\text{month}$                                |
|                       | <i>DQ</i>       | antibody levels                                                                                                                             | $\beta_1\text{SNP} + \beta_2\text{age} + \beta_3\text{gender} + \beta_4\text{malaria status} + \beta_5\text{ethnicity} + \beta_6\text{village}$                       |
|                       | <i>BJ</i>       | antibody levels                                                                                                                             | $\beta_1\text{SNP} + \beta_2\text{age} + \beta_3\text{gender} + \beta_4\text{malaria status} + \beta_5\text{ethnicity} + \beta_6\text{village} + \beta_7\text{month}$ |
|                       | <i>SA</i>       | antibody levels                                                                                                                             | $\beta_1\text{SNP} + \beta_2\text{age} + \beta_3\text{gender} + \beta_4\text{ethnicity} + \beta_5\text{village}$                                                      |
|                       | <i>KM</i>       | antibody levels                                                                                                                             | $\beta_1\text{SNP} + \beta_3\text{gender} + \beta_4\text{malaria status} + \beta_5\text{ethnicity} + \beta_6\text{month}$                                             |
|                       | <i>TN</i>       | antibody levels                                                                                                                             | $\beta_1\text{SNP} + \beta_2\text{age} + \beta_3\text{gender} + \beta_4\text{malaria status} + \beta_5\text{ethnicity} + \beta_6\text{village} + \beta_7\text{month}$ |
|                       | <i>TG</i>       | antibody levels                                                                                                                             | $\beta_1\text{SNP} + \beta_2\text{age} + \beta_3\text{gender} + \beta_4\text{malaria status} + \beta_5\text{ethnicity} + \beta_6\text{village} + \beta_7\text{month}$ |
|                       | <i>TP</i>       | antibody levels                                                                                                                             | $\beta_1\text{SNP} + \beta_2\text{age} + \beta_3\text{gender} + \beta_4\text{malaria status} + \beta_5\text{ethnicity} + \beta_6\text{village}$                       |
| <i>SL</i>             | antibody levels | $\beta_1\text{SNP} + \beta_2\text{age} + \beta_3\text{gender} + \beta_4\text{malaria status} + \beta_5\text{village} + \beta_6\text{month}$ |                                                                                                                                                                       |

**Additional Table ST3C: Details of logistic regression model used to investigate effect of SNPs with significant SNP-antibody associations on malaria infection.** All covariates were categorical.

| Regression model type | Data used                     | Outcome           | Full model                                                                                                                                                   |
|-----------------------|-------------------------------|-------------------|--------------------------------------------------------------------------------------------------------------------------------------------------------------|
| Logistic              | <i>DQ, BJ, KM, TN, TG, TP</i> | malaria infection | $\beta_1\text{SNP} + \beta_2\text{age} + \beta_3\text{gender} + \beta_4\text{ethnicity} + \beta_5\text{village} + \beta_6\text{month} + \beta_7\text{study}$ |

**Additional Table ST3D: Details of linear regression model used to investigate effect of SNPs with significant SNP-antibody associations on parasite density.** All covariates were categorical except for parasite density, which was continuous.

| Regression model type | Data used                     | Outcome          | Full model                                                                                                                                                   |
|-----------------------|-------------------------------|------------------|--------------------------------------------------------------------------------------------------------------------------------------------------------------|
| Linear                | <i>DP, DQ, BJ, TN, TG, TP</i> | parasite density | $\beta_1\text{SNP} + \beta_2\text{age} + \beta_3\text{gender} + \beta_4\text{ethnicity} + \beta_5\text{village} + \beta_6\text{month} + \beta_7\text{study}$ |
