# Supplementary material for: Genetic determinants of anti-malarial acquired immunity in a large multi-centre study
Source: Springer Nature journal article supplement (doi:10.1186/s12936-015-0833-x), 2015-08-27
Supplement: MOESM13 [file 9761536]

## ADDITIONAL FILE 13: SUPPLEMENTARY TABLES

### Genetic Determinants Of Anti-Malarial Acquired Immunity In A Large Multi-Centre Study

Jennifer M.G. Shelton, Patrick Corran, Paul Risley, Nilupa Silva, Christina Hubbart, Anna Jeffreys, Kate Rowlands, Rachel Craik, Victoria Cornelius, Meike Hensmann, Sile Molloy, Nuno Sepulveda, Taane G. Clark, Gavin Band, Geraldine M. Clarke, Christopher C.A. Spencer, Angeliki Kerasidou, Susana Campino, Sarah Auburn, Adama Tall, Alioune Badara Ly, Odile Mercereau-Puijalon, Anavaj Sakuntabhai, Abdoulaye Djimde, Boubacar Maiga, Ousmane Toure, Ogobara Doumbo, Amagana Dolo, Marita Troye-Blomberg, Valentina D. Mangano, Frederica Verra, David Modiano, Edith Bougouma, Sodiomon B. Sirima, Muntaser Ibrahim, Ayman Hussain, Nahid Eid, Abier Elzein, Hiba Mohamed, Ahmed Elhassan, Ibrahim Elhassan, Thomas N. Williams, Carolyne Ndila, Alexander Macharia, Kevin Marsh, Alphaxard Manjurano, Hugh Reyburn, Martha Lemnge, Deus Ishengoma, Richard Carter, Nadira Karunaweera, Deepika Fernando, Rajika Dewasurendra, Christopher J. Drakeley, Eleanor M. Riley, Dominic P. Kwiatkowski, and Kirk A. Rockett, in collaboration with the MalariaGEN Consortium,

Corresponding authors Kirk A. Rockett and Dominic P. Kwiatkowski

Wellcome Trust Centre for Human Genetics, University of Oxford, Roosevelt Drive, Oxford, UK

This file contains:

**Additional Table ST7A:** Results of site-specific linear regression analysis investigating the effect of age, gender and malaria status as determined by microscopy on antibody levels to AMA1. Also adjusted for village (>20), ethnicity (>20) and sample month (>20), where data were available for site.

**Additional Table ST7B:** Results of linear regression analysis investigating the effect of age, gender and malaria status as determined by microscopy on antibody levels to MSP1 at each site.

**Additional Table ST7C:** Results of site-specific linear regression analysis investigating the effect of age, gender and malaria status as determined by microscopy on antibody levels to MSP2 at each site. Also adjusted for village (>20), ethnicity (>20) and sample month (>20), where data were available for site.

**Additional Table ST7D:** Results of site-specific linear regression analysis investigating the effect of age, gender and malaria status as determined by microscopy on antibody levels to NANP at each site. Also adjusted for village (>20), ethnicity (>20) and sample month (>20), where data were available for site. Data not available for Tanzania (Moshi).

**Additional Table ST7E:** Results of site-specific linear regression analysis investigating the effect of age, gender and malaria status as determined by microscopy on total IgE levels at each site. Also adjusted for village (>20), ethnicity (>20) and sample month (>20), where data were available for site. Data not available for Tanzania (Moshi).

**Additional Table ST7A:** Results of site-specific linear regression analysis investigating the effect of age, gender and malaria status as determined by microscopy on antibody levels to AMA1. Also adjusted for village (>20), ethnicity (>20) and sample month (>20), where data were available for site.

| Factor                   | Senegal<br>(n=489)         |                  | Mali – Pongonon<br>(n=276) |         | Mali – Manteourou<br>(n=643) |         | Burkina Faso<br>(n=1827)      |                  | Sudan<br>(n=81)            |         |
|--------------------------|----------------------------|------------------|----------------------------|---------|------------------------------|---------|-------------------------------|------------------|----------------------------|---------|
|                          | beta (95% CI) <sup>b</sup> | p-value          | beta (95% CI) <sup>b</sup> | p-value | beta (95% CI) <sup>b</sup>   | p-value | beta (95% CI) <sup>b</sup>    | p-value          | beta (95% CI) <sup>b</sup> | p-value |
| <i>Age (years)</i>       |                            |                  |                            |         |                              |         |                               |                  |                            |         |
| <1                       | 0                          |                  | -                          |         | -                            |         | 0                             |                  | -                          |         |
| 1-2                      | -0.02 (-0.86 to 0.83)      | 0.969            | 0                          |         | -                            |         | 0.42 (0 to 0.84)              | 0.052            | -                          |         |
| 2-5                      | 0.20 (-0.55 to 0.96)       | 0.599            | -0.40 (-1.24 to 0.44)      | 0.354   | 0                            |         | <b>1.19 (0.84 to 1.53)</b>    | <b>&lt;0.001</b> | -                          |         |
| 5-15                     | <b>1.11 (0.39 to 1.83)</b> | <b>0.003</b>     | -0.25 (-1.08 to 0.59)      | 0.565   | -0.15 (-0.38 to 0.08)        | 0.193   | <b>1.48 (1.16 to 1.81)</b>    | <b>&lt;0.001</b> | 0                          |         |
| 15-30                    | <b>1.66 (0.93 to 2.38)</b> | <b>&lt;0.001</b> | 0.03 (-1.32 to 1.38)       | 0.968   | -0.10 (-0.35 to 0.15)        | 0.428   | <b>1.16 (0.83 to 1.49)</b>    | <b>&lt;0.001</b> | 0.15 (-0.30 to 0.61)       | 0.513   |
| >30                      | <b>1.43 (0.70 to 2.16)</b> | <b>&lt;0.001</b> | -0.46 (-1.51 to 0.60)      | 0.396   | -0.19 (-0.44 to 0.05)        | 0.127   | <b>0.93 (0.60 to 1.26)</b>    | <b>&lt;0.001</b> | 0.18 (-0.37 to 0.72)       | 0.530   |
| <i>Gender</i>            |                            |                  |                            |         |                              |         |                               |                  |                            |         |
| Female                   | 0                          |                  | 0                          |         | 0                            |         | 0                             |                  | 0                          |         |
| Male                     | -0.03 (-0.18 to 0.12)      | 0.693            | -0.23 (-0.51 to 0.04)      | 0.096   | 0.01 (-0.12 to 0.14)         | 0.884   | <b>-0.12 (-0.22 to -0.03)</b> | <b>0.012</b>     | -0.06 (-0.49 to 0.37)      | 0.793   |
| <i>Microscopy result</i> |                            |                  |                            |         |                              |         |                               |                  |                            |         |
| Negative                 | -                          |                  | -                          |         | 0                            |         | 0                             |                  | -                          |         |
| Positive                 | -                          |                  | -                          |         | -0.13 (-0.28 to 0.03)        | 0.120   | <b>0.13 (0.02 to 0.24)</b>    | <b>0.016</b>     | -                          |         |

| Factor                   | Kenya<br>(n=1808)          |         | Tanzania - Moshi<br>(n=6011) |                  | Tanzania – SP1<br>(n=536)  |              | Tanzania – SP2<br>(n=490)     |                  | Sri Lanka<br>(n=792)       |         |
|--------------------------|----------------------------|---------|------------------------------|------------------|----------------------------|--------------|-------------------------------|------------------|----------------------------|---------|
|                          | beta (95% CI) <sup>b</sup> | p-value | beta (95% CI) <sup>b</sup>   | p-value          | beta (95% CI) <sup>b</sup> | p-value      | beta (95% CI) <sup>b</sup>    | p-value          | beta (95% CI) <sup>b</sup> | p-value |
| <i>Age (years)</i>       |                            |         |                              |                  |                            |              |                               |                  |                            |         |
| <1                       | -                          |         | 0                            |                  | -                          |              | 0                             |                  | -                          |         |
| 1-2                      | -                          |         | 0 (-0.11 to 0.10)            | 0.966            | 0                          |              | -0.13 (-0.95 to 0.69)         | 0.760            | -                          |         |
| 2-5                      | -                          |         | <b>0.13 (0.04 to 0.21)</b>   | <b>0.003</b>     | 0.51 (-0.54 to 1.55)       | 0.344        | -0.12 (-0.64 to 0.39)         | 0.638            | -                          |         |
| 5-15                     | -                          |         | <b>0.39 (0.31 to 0.46)</b>   | <b>&lt;0.001</b> | <b>1.19 (0.15 to 2.23)</b> | <b>0.025</b> | <b>0.67 (0.22 to 1.12)</b>    | <b>0.004</b>     | 0                          |         |
| 15-30                    | -                          |         | <b>0.49 (0.41 to 0.57)</b>   | <b>&lt;0.001</b> | <b>1.33 (0.25 to 2.41)</b> | <b>0.016</b> | <b>0.83 (0.36 to 1.30)</b>    | <b>&lt;0.001</b> | -0.03 (-0.64 to 0.59)      | 0.932   |
| >30                      | -                          |         | <b>0.56 (0.47 to 0.64)</b>   | <b>&lt;0.001</b> | -                          |              | 0.37 (-0.014 to 0.88)         | 0.156            | 0.14 (-0.47 to 0.75)       | 0.660   |
| <i>Gender</i>            |                            |         |                              |                  |                            |              |                               |                  |                            |         |
| Female                   | 0                          |         | 0                            |                  | 0                          |              | 0                             |                  | 0                          |         |
| Male                     | -0.02 (-0.13 to 0.09)      | 0.725   | 0.02 (-0.02 to 0.05)         | 0.322            | -0.06 (-0.23 to 0.12)      | 0.545        | <b>-0.27 (-0.44 to -0.10)</b> | <b>0.002</b>     | -0.04 (-0.13 to 0.05)      | 0.407   |
| <i>Microscopy result</i> |                            |         |                              |                  |                            |              |                               |                  |                            |         |
| Negative                 | 0                          |         | 0                            |                  | 0                          |              | 0                             |                  | -                          |         |
| Positive                 | 0.02 (-0.13 to 0.17)       | 0.775   | <b>0.12 (0.08 to 0.17)</b>   | <b>&lt;0.001</b> | 0.12 (-0.10 to 0.34)       | 0.273        | <b>0.39 (0.21 to 0.58)</b>    | <b>&lt;0.001</b> | -                          |         |

**Additional Table ST7B:** Results of linear regression analysis investigating the effect of age, gender and malaria status as determined by microscopy on antibody levels to MSP1 at each site.

| Factor                   | Senegal<br>(n=489)         |                  | Mali – Pongonon<br>(n=277) |         | Mali – Manteourou<br>(n=643) |         | Burkina Faso<br>(n=1827)      |                  | Sudan<br>(n=81)            |              |
|--------------------------|----------------------------|------------------|----------------------------|---------|------------------------------|---------|-------------------------------|------------------|----------------------------|--------------|
|                          | beta (95% CI) <sup>b</sup> | p-value          | beta (95% CI) <sup>b</sup> | p-value | beta (95% CI) <sup>b</sup>   | p-value | beta (95% CI) <sup>b</sup>    | p-value          | beta (95% CI) <sup>b</sup> | p-value      |
| <i>Age (years)</i>       |                            |                  |                            |         |                              |         |                               |                  |                            |              |
| <1                       | 0                          |                  | -                          |         | -                            |         | 0                             |                  | -                          |              |
| 1-2                      | 0.59 (-0.11 to 1.30)       | 0.101            | 0                          |         | -                            |         | -0.12 (-0.48 to 0.25)         | 0.528            | -                          |              |
| 2-5                      | <b>0.66 (0.04 to 1.29)</b> | <b>0.037</b>     | -0.01 (-0.78 to 0.76)      | 0.984   | 0                            |         | 0.15 (-0.15 to 0.44)          | 0.333            | -                          |              |
| 5-15                     | <b>0.85 (0.25 to 1.44)</b> | <b>0.005</b>     | -0.01 (-0.78 to 0.76)      | 0.979   | -0.03 (-0.33 to 0.26)        | 0.825   | <b>0.47 (0.19 to 0.75)</b>    | <b>0.001</b>     | 0                          |              |
| 15-30                    | <b>1.39 (0.79 to 1.99)</b> | <b>&lt;0.001</b> | -0.32 (-1.56 to 0.92)      | 0.612   | -0.10 (-0.42 to 0.23)        | 0.558   | <b>0.56 (0.28 to 0.85)</b>    | <b>&lt;0.001</b> | 0.13 (-0.35 to 0.61)       | 0.608        |
| >30                      | <b>1.50 (0.90 to 2.10)</b> | <b>&lt;0.001</b> | -0.28 (-1.29 to 0.73)      | 0.589   | 0.03 (-0.30 to 0.36)         | 0.863   | <b>0.71 (0.42 to 1.00)</b>    | <b>&lt;0.001</b> | <b>0.56 (0.01 to 1.12)</b> | <b>0.049</b> |
| <i>Gender</i>            |                            |                  |                            |         |                              |         |                               |                  |                            |              |
| Female                   | 0                          |                  | 0                          |         | 0                            |         | 0                             |                  | 0                          |              |
| Male                     | -0.15 (-0.29 to -0.01)     | 0.040            | -0.05 (-0.31 to 0.21)      | 0.725   | -0.06 (-0.24 to 0.11)        | 0.475   | <b>-0.27 (-0.36 to -0.19)</b> | <b>&lt;0.001</b> | -0.25 (-0.69 to 0.19)      | 0.273        |
| <i>Microscopy result</i> |                            |                  |                            |         |                              |         |                               |                  |                            |              |
| Negative                 | -                          |                  | -                          |         | 0                            |         | 0                             |                  | -                          |              |
| Positive                 | -                          |                  | -                          |         | -0.01 (-0.22 to 0.20)        | 0.922   | 0.01 (-0.09 to 0.10)          | 0.882            | -                          |              |

| Factor                   | Kenya<br>(n=1808)          |         | Tanzania - Moshi<br>(n=6004) |                  | Tanzania – SP1<br>(n=536)  |         | Tanzania – SP2<br>(n=505)     |                  | Sri Lanka<br>(n=790)       |         |
|--------------------------|----------------------------|---------|------------------------------|------------------|----------------------------|---------|-------------------------------|------------------|----------------------------|---------|
|                          | beta (95% CI) <sup>b</sup> | p-value | beta (95% CI) <sup>b</sup>   | p-value          | beta (95% CI) <sup>b</sup> | p-value | beta (95% CI) <sup>b</sup>    | p-value          | beta (95% CI) <sup>b</sup> | p-value |
| <i>Age (years)</i>       |                            |         |                              |                  |                            |         |                               |                  |                            |         |
| <1                       | -                          |         | 0                            |                  | 0                          |         | 0                             |                  | -                          |         |
| 1-2                      | -                          |         | -0.12 (-0.24 to 0.01)        | 0.063            | -0.52 (-2.17 to 1.12)      | 0.532   | 0.20 (-0.46 to 0.86)          | 0.553            | -                          |         |
| 2-5                      | -                          |         | 0.05 (-0.04 to 0.15)         | 0.262            | -0.37 (-1.85 to 1.11)      | 0.626   | -0.27 (-0.71 to 0.17)         | 0.226            | -                          |         |
| 5-15                     | -                          |         | <b>0.34 (0.25 to 0.43)</b>   | <b>&lt;0.001</b> | 0 (-1.48 to 1.47)          | 0.997   | 0.36 (-0.02 to 0.74)          | 0.061            | 0                          |         |
| 15-30                    | -                          |         | <b>0.68 (0.59 to 0.78)</b>   | <b>&lt;0.001</b> | 0.34 (-1.15 to 1.84)       | 0.652   | <b>0.71 (0.31 to 1.10)</b>    | <b>&lt;0.001</b> | 0.07 (-0.51 to 0.64)       | 0.825   |
| >30                      | -                          |         | <b>0.85 (0.76 to 0.94)</b>   | <b>&lt;0.001</b> | -                          |         | <b>0.72 (0.29 to 1.15)</b>    | <b>0.001</b>     | 0.26 (-0.32 to 0.83)       | 0.378   |
| <i>Gender</i>            |                            |         |                              |                  |                            |         |                               |                  |                            |         |
| Female                   | 0                          |         | 0                            |                  | 0                          |         | 0                             |                  | 0                          |         |
| Male                     | -0.03 (-0.10 to 0.05)      | 0.475   | -0.01 (-0.05 to 0.04)        | 0.776            | -0.11 (-0.26 to 0.03)      | 0.136   | <b>-0.35 (-0.49 to -0.21)</b> | <b>&lt;0.001</b> | 0.01 (-0.07 to 0.10)       | 0.737   |
| <i>Microscopy result</i> |                            |         |                              |                  |                            |         |                               |                  |                            |         |
| Negative                 | 0                          |         | 0                            |                  | 0                          |         | 0                             |                  | -                          |         |
| Positive                 | 0.03 (-0.08 to 0.13)       | 0.602   | <b>0.25 (0.19 to 0.31)</b>   | <b>&lt;0.001</b> | 0.17 (-0.01 to 0.35)       | 0.059   | <b>0.23 (0.07 to 0.39)</b>    | <b>0.004</b>     | -                          |         |

**Additional Table ST7C:** Results of site-specific linear regression analysis investigating the effect of age, gender and malaria status as determined by microscopy on antibody levels to MSP2 at each site. Also adjusted for village (>20), ethnicity (>20) and sample month (>20), where data were available for site.

| Factor                   | Senegal<br>(n=489)         |                  | Mali – Pongonon<br>(n=275) |         | Mali – Manteourou<br>(n=643) |         | Burkina Faso<br>(n=1824)      |                  | Sudan<br>(n=81)            |         |
|--------------------------|----------------------------|------------------|----------------------------|---------|------------------------------|---------|-------------------------------|------------------|----------------------------|---------|
|                          | beta (95% CI) <sup>b</sup> | p-value          | beta (95% CI) <sup>b</sup> | p-value | beta (95% CI) <sup>b</sup>   | p-value | beta (95% CI) <sup>b</sup>    | p-value          | beta (95% CI) <sup>b</sup> | p-value |
| <i>Age (years)</i>       |                            |                  |                            |         |                              |         |                               |                  |                            |         |
| <1                       | 0                          |                  | -                          |         | -                            |         | 0                             |                  | -                          |         |
| 1-2                      | 0.22 (-0.37 to 0.81)       | 0.464            | 0                          |         | -                            |         | <b>0.52 (0.20 to 0.84)</b>    | <b>0.001</b>     | -                          |         |
| 2-5                      | 0.33 (-0.20 to 0.86)       | 0.221            | -0.04 (-0.77 to 0.69)      | 0.913   | 0                            |         | <b>1.11 (0.85 to 1.37)</b>    | <b>&lt;0.001</b> | -                          |         |
| 5-15                     | <b>0.94 (0.44 to 1.44)</b> | <b>&lt;0.001</b> | 0.16 (-0.56 to 0.89)       | 0.658   | -0.10 (-0.34 to 0.13)        | 0.386   | <b>1.56 (1.31 to 1.80)</b>    | <b>&lt;0.001</b> | 0                          |         |
| 15-30                    | <b>1.48 (0.97 to 1.99)</b> | <b>&lt;0.001</b> | -0.20 (-1.37 to 0.96)      | 0.733   | -0.10 (-0.36 to 0.15)        | 0.430   | <b>1.43 (1.18 to 1.68)</b>    | <b>&lt;0.001</b> | 0.36 (-0.02 to 0.75)       | 0.070   |
| >30                      | <b>1.55 (1.04 to 2.06)</b> | <b>&lt;0.001</b> | -0.14 (-1.05 to 0.77)      | 0.761   | -0.04 (-0.30 to 0.21)        | 0.739   | <b>1.34 (1.09 to 1.59)</b>    | <b>&lt;0.001</b> | 0.35 (-0.09 to 0.80)       | 0.126   |
| <i>Gender</i>            |                            |                  |                            |         |                              |         |                               |                  |                            |         |
| Female                   | 0                          |                  | 0                          |         | 0                            |         | 0                             |                  | 0                          |         |
| Male                     | -0.02 (-0.14 to 0.10)      | 0.756            | 0.10 (-0.13 to 0.34)       | 0.396   | 0.10 (-0.03 to 0.24)         | 0.138   | <b>-0.17 (-0.24 to -0.09)</b> | <b>&lt;0.001</b> | -0.25 (-0.60 to 0.11)      | 0.180   |
| <i>Microscopy result</i> |                            |                  |                            |         |                              |         |                               |                  |                            |         |
| Negative                 | -                          |                  | -                          |         | 0                            |         | 0                             |                  | -                          |         |
| Positive                 | -                          |                  | -                          |         | 0.01 (-0.15 to 0.18)         | 0.867   | <b>0.23 (0.14 to 0.31)</b>    | <b>&lt;0.001</b> | -                          |         |

| Factor                   | Kenya<br>(n=1808)          |              | Tanzania - Moshi<br>(n=6026) |                  | Tanzania – SP1<br>(n=533)     |              | Tanzania – SP2<br>(n=491)     |                  | Sri Lanka<br>(n=790)       |         |
|--------------------------|----------------------------|--------------|------------------------------|------------------|-------------------------------|--------------|-------------------------------|------------------|----------------------------|---------|
|                          | beta (95% CI) <sup>b</sup> | p-value      | beta (95% CI) <sup>b</sup>   | p-value          | beta (95% CI) <sup>b</sup>    | p-value      | beta (95% CI) <sup>b</sup>    | p-value          | beta (95% CI) <sup>b</sup> | p-value |
| <i>Age (years)</i>       |                            |              |                              |                  |                               |              |                               |                  |                            |         |
| <1                       | -                          |              | 0                            |                  | -                             |              | 0                             |                  | -                          |         |
| 1-2                      | -                          |              | <b>0.14 (0.03 to 0.25)</b>   | <b>0.010</b>     | 0                             |              | -0.03 (-0.77 to 0.71)         | 0.936            | -                          |         |
| 2-5                      | -                          |              | <b>0.19 (0.11 to 0.28)</b>   | <b>&lt;0.001</b> | 0.05 (-0.61 to 0.70)          | 0.891        | -0.16 (-0.63 to 0.30)         | 0.486            | -                          |         |
| 5-15                     | -                          |              | <b>0.43 (0.35 to 0.51)</b>   | <b>&lt;0.001</b> | 0.63 (-0.02 to 1.29)          | 0.057        | <b>0.43 (0.02 to 0.83)</b>    | <b>0.039</b>     | 0                          |         |
| 15-30                    | -                          |              | <b>0.61 (0.53 to 0.69)</b>   | <b>&lt;0.001</b> | <b>1.10 (0.40 to 1.81)</b>    | <b>0.002</b> | <b>0.79 (0.36 to 1.21)</b>    | <b>&lt;0.001</b> | 0.26 (-0.32 to 0.85)       | 0.377   |
| >30                      | -                          |              | <b>0.66 (0.58 to 0.74)</b>   | <b>&lt;0.001</b> | -                             |              | <b>0.49 (0.03 to 0.95)</b>    | <b>0.037</b>     | 0.36 (-0.23 to 0.94)       | 0.231   |
| <i>Gender</i>            |                            |              |                              |                  |                               |              |                               |                  |                            |         |
| Female                   | 0                          |              | 0                            |                  | 0                             |              | 0                             |                  | 0                          |         |
| Male                     | -0.04 (-0.13 to 0.04)      | 0.339        | 0.01 (-0.02 to 0.05)         | 0.427            | <b>-0.18 (-0.33 to -0.03)</b> | <b>0.017</b> | <b>-0.21 (-0.36 to -0.06)</b> | <b>0.006</b>     | -0.01 (-0.09 to 0.07)      | 0.823   |
| <i>Microscopy result</i> |                            |              |                              |                  |                               |              |                               |                  |                            |         |
| Negative                 | 0                          |              | 0                            |                  | 0                             |              | 0                             |                  | -                          |         |
| Positive                 | <b>0.15 (0.03 to 0.26)</b> | <b>0.013</b> | <b>0.16 (0.11 to 0.20)</b>   | <b>&lt;0.001</b> | <b>0.29 (0.11 to 0.48)</b>    | <b>0.002</b> | <b>0.37 (0.20 to 0.53)</b>    | <b>&lt;0.001</b> | -                          |         |

**Additional Table ST7D:** Results of site-specific linear regression analysis investigating the effect of age, gender and malaria status as determined by microscopy on antibody levels to NANP at each site. Also adjusted for village (>20), ethnicity (>20) and sample month (>20), where data were available for site. Data not available for Tanzania (Moshi).

| Factor                   | Senegal<br>(n=489)         |                  | Mali – Pongonon<br>(n=276) |         | Mali – Manteourou<br>(n=643) |              | Burkina Faso<br>(n=1841)      |                  | Sudan<br>(n=81)            |              |
|--------------------------|----------------------------|------------------|----------------------------|---------|------------------------------|--------------|-------------------------------|------------------|----------------------------|--------------|
|                          | beta (95% CI) <sup>b</sup> | p-value          | beta (95% CI) <sup>b</sup> | p-value | beta (95% CI) <sup>b</sup>   | p-value      | beta (95% CI) <sup>b</sup>    | p-value          | beta (95% CI) <sup>b</sup> | p-value      |
| <i>Age (years)</i>       |                            |                  |                            |         |                              |              |                               |                  |                            |              |
| <1                       | 0                          |                  | -                          |         | -                            |              | 0                             |                  | -                          |              |
| 1-2                      | 0.21 (-0.26 to 0.67)       | 0.379            | 0                          |         | -                            |              | <b>0.36 (0.09 to 0.62)</b>    | <b>0.008</b>     | -                          |              |
| 2-5                      | 0.32 (-0.11 to 0.74)       | 0.143            | 0.13 (-0.82 to 1.07)       | 0.795   | 0                            |              | <b>0.60 (0.39 to 0.81)</b>    | <b>&lt;0.001</b> | -                          |              |
| 5-15                     | <b>0.80 (0.40 to 1.21)</b> | <b>&lt;0.001</b> | -0.15 (-1.09 to 0.79)      | 0.753   | 0.13 (-0.07 to 0.33)         | 0.195        | <b>1.02 (0.81 to 1.22)</b>    | <b>&lt;0.001</b> | 0                          |              |
| 15-30                    | <b>1.06 (0.65 to 1.47)</b> | <b>&lt;0.001</b> | -0.57 (-2.02 to 0.89)      | 0.448   | <b>0.28 (0.06 to 0.49)</b>   | <b>0.014</b> | <b>1.24 (1.03 to 1.45)</b>    | <b>&lt;0.001</b> | 0.19 (-0.07 to 0.45)       | 0.165        |
| >30                      | <b>1.35 (0.94 to 1.76)</b> | <b>&lt;0.001</b> | -0.70 (-1.88 to 0.48)      | 0.247   | <b>0.29 (0.07 to 0.51)</b>   | <b>0.010</b> | <b>1.44 (1.23 to 1.65)</b>    | <b>&lt;0.001</b> | <b>0.50 (0.19 to 0.81)</b> | <b>0.002</b> |
| <i>Gender</i>            |                            |                  |                            |         |                              |              |                               |                  |                            |              |
| Female                   | 0                          |                  | 0                          |         | 0                            |              | 0                             |                  | 0                          |              |
| Male                     | 0.05 (-0.04 to 0.14)       | 0.272            | -0.20 (-0.49 to 0.09)      | 0.177   | -0.02 (-0.14 to 0.10)        | 0.747        | <b>-0.10 (-0.16 to -0.03)</b> | <b>0.004</b>     | -0.14 (-0.38 to 0.10)      | 0.269        |
| <i>Microscopy result</i> |                            |                  |                            |         |                              |              |                               |                  |                            |              |
| Negative                 | -                          |                  | -                          |         | 0                            |              | 0                             |                  | -                          |              |
| Positive                 | -                          |                  | -                          |         | 0.05 (-0.09 to 0.19)         | 0.509        | 0 (-0.08 to 0.07)             | 0.937            | -                          |              |

| Factor                   | Kenya<br>(n=1808)          |         | Tanzania – SP1<br>(n=536)  |              | Tanzania – SP2<br>(n=494)  |              | Sri Lanka<br>(n=790)       |         |
|--------------------------|----------------------------|---------|----------------------------|--------------|----------------------------|--------------|----------------------------|---------|
|                          | beta (95% CI) <sup>b</sup> | p-value | beta (95% CI) <sup>b</sup> | p-value      | beta (95% CI) <sup>b</sup> | p-value      | beta (95% CI) <sup>b</sup> | p-value |
| <i>Age (years)</i>       |                            |         |                            |              |                            |              |                            |         |
| <1                       | -                          |         | -                          |              | 0                          |              | -                          |         |
| 1-2                      | -                          |         | 0                          |              | -0.06 (-0.57 to 0.45)      | 0.816        | -                          |         |
| 2-5                      | -                          |         | 0.13 (-0.25 to 0.51)       | 0.505        | -0.23 (-0.56 to 0.09)      | 0.164        | -                          |         |
| 5-15                     | -                          |         | 0.37 (-0.01 to 0.74)       | 0.055        | 0.21 (-0.08 to 0.49)       | 0.158        | 0                          |         |
| 15-30                    | -                          |         | <b>0.70 (0.28 to 1.12)</b> | <b>0.001</b> | <b>0.51 (0.21 to 0.80)</b> | <b>0.001</b> | -0.01 (-0.44 to 0.42)      | 0.957   |
| >30                      | -                          |         | -                          |              | 0.24 (-0.08 to 0.57)       | 0.145        | 0.09 (-0.34 to 0.52)       | 0.684   |
| <i>Gender</i>            |                            |         |                            |              |                            |              |                            |         |
| Female                   | 0                          |         | 0                          |              | 0                          |              | 0                          |         |
| Male                     | 0.02 (-0.03 to 0.07)       | 0.486   | 0 (-0.11 to 0.10)          | 0.930        | -0.02 (-0.12 to 0.09)      | 0.736        | 0.05 (-0.01 to 0.11)       | 0.097   |
| <i>Microscopy result</i> |                            |         |                            |              |                            |              |                            |         |
| Negative                 | 0                          |         | 0                          |              | 0                          |              | -                          |         |
| Positive                 | 0.04 (-0.03 to 0.11)       | 0.236   | 0.10 (-0.03 to 0.23)       | 0.149        | -0.01 (-0.13 to 0.10)      | 0.817        | -                          |         |

**Additional Table ST7E:** Results of site-specific linear regression analysis investigating the effect of age, gender and malaria status as determined by microscopy on total IgE levels at each site. Also adjusted for village (>20), ethnicity (>20) and sample month (>20), where data were available for site. Data not available for Tanzania (Moshi).

| Factor                   | Senegal<br>(n=489)         |              | Mali – Pongonon<br>(n=282) |         | Mali – Manteourou<br>(n=643) |         | Burkina Faso<br>(n=1848)   |                  | Sudan<br>(n=82)            |         |
|--------------------------|----------------------------|--------------|----------------------------|---------|------------------------------|---------|----------------------------|------------------|----------------------------|---------|
|                          | beta (95% CI) <sup>b</sup> | p-value      | beta (95% CI) <sup>b</sup> | p-value | beta (95% CI) <sup>b</sup>   | p-value | beta (95% CI) <sup>b</sup> | p-value          | beta (95% CI) <sup>b</sup> | p-value |
| <i>Age (years)</i>       |                            |              |                            |         |                              |         |                            |                  |                            |         |
| <1                       | 0                          |              | -                          |         | -                            |         | 0                          |                  | -                          |         |
| 1-2                      | -0.35 (-0.96 to 0.27)      | 0.268        | 0                          |         | -                            |         | -0.09 (-0.41 to 0.22)      | 0.566            | -                          |         |
| 2-5                      | 0.03 (-0.48 to 0.55)       | 0.894        | -0.41 (-0.96 to 0.14)      | 0.145   | 0                            |         | 0.04 (-0.23 to 0.31)       | 0.761            | -                          |         |
| 5-15                     | 0.21 (-0.28 to 0.69)       | 0.399        | -0.49 (-1.04 to 0.05)      | 0.077   | -0.09 (-0.26 to 0.08)        | 0.309   | -0.02 (-0.27 to 0.24)      | 0.906            | 0                          |         |
| 15-30                    | -0.07 (-0.56 to 0.43)      | 0.795        | -0.40 (-1.24 to 0.44)      | 0.348   | -0.08 (-0.27 to 0.11)        | 0.406   | 0.09 (-0.16 to 0.35)       | 0.476            | 0.21 (-0.40 to 0.81)       | 0.507   |
| >30                      | -0.10 (-0.59 to 0.39)      | 0.690        | -0.51 (-1.19 to 0.16)      | 0.139   | -0.06 (-0.25 to 0.13)        | 0.548   | -0.10 (-0.36 to 0.16)      | 0.431            | -0.39 (-1.14 to 0.36)      | 0.309   |
| <i>Gender</i>            |                            |              |                            |         |                              |         |                            |                  |                            |         |
| Female                   | 0                          |              | 0                          |         | 0                            |         | 0                          |                  | 0                          |         |
| Male                     | <b>0.15 (0.01 to 0.29)</b> | <b>0.037</b> | 0.13 (-0.05 to 0.31)       | 0.150   | -0.06 (-0.16 to 0.04)        | 0.238   | <b>0.17 (0.10 to 0.24)</b> | <b>&lt;0.001</b> | 0.47 (-0.10 to 1.04)       | 0.110   |
| <i>Microscopy result</i> |                            |              |                            |         |                              |         |                            |                  |                            |         |
| Negative                 | -                          |              | -                          |         | 0                            |         | 0                          |                  | -                          |         |
| Positive                 | -                          |              | -                          |         | 0.05 (-0.07 to 0.18)         | 0.383   | <b>0.08 (0 to 0.15)</b>    | <b>0.041</b>     | -                          |         |

| Factor                   | Kenya<br>(n=1808)          |         | Tanzania – SP1<br>(n=509)  |              | Tanzania – SP2<br>(n=553)   |              | Sri Lanka<br>(n=793)       |                  |
|--------------------------|----------------------------|---------|----------------------------|--------------|-----------------------------|--------------|----------------------------|------------------|
|                          | beta (95% CI) <sup>b</sup> | p-value | beta (95% CI) <sup>b</sup> | p-value      | beta (95% CI) <sup>b</sup>  | p-value      | beta (95% CI) <sup>b</sup> | p-value          |
| <i>Age (years)</i>       |                            |         |                            |              |                             |              |                            |                  |
| <1                       | -                          |         | 0                          |              | 0                           |              | -                          |                  |
| 1-2                      | -                          |         | 0.34 (-0.95 to 1.64)       | 0.602        | 0.23 (-0.76 to 1.21)        | 0.655        | -                          |                  |
| 2-5                      | -                          |         | 0.38 (-0.81 to 1.57)       | 0.529        | -0.04 (-0.54 to 0.47)       | 0.883        | -                          |                  |
| 5-15                     | -                          |         | 0.73 (-0.46 to 1.92)       | 0.230        | <b>0.51 (0.06 to 0.96)</b>  | <b>0.028</b> | 0                          |                  |
| 15-30                    | -                          |         | 0.90 (-0.31 to 2.10)       | 0.146        | <b>0.67 (0.20 to 1.14)</b>  | <b>0.005</b> | -0.32 (-0.91 to 0.27)      | 0.290            |
| >30                      | -                          |         | -                          |              | 0.45 (-0.05 to 0.96)        | 0.078        | -0.21 (-0.80 to 0.38)      | 0.483            |
| <i>Gender</i>            |                            |         |                            |              |                             |              |                            |                  |
| Female                   | 0                          |         | 0                          |              | 0                           |              | 0                          |                  |
| Male                     | 0.01 (-0.06 to 0.07)       | 0.845   | <b>0.13 (0.01 to 0.25)</b> | <b>0.033</b> | <b>0.10 (-0.05 to 0.26)</b> | <b>0.189</b> | <b>0.30 (0.22 to 0.39)</b> | <b>&lt;0.001</b> |
| <i>Microscopy result</i> |                            |         |                            |              |                             |              |                            |                  |
| Negative                 | 0                          |         | 0                          |              | 0                           |              | -                          |                  |
| Positive                 | 0 (-0.09 to -0.09)         | 0.989   | -0.01 (-0.16 to 0.14)      | 0.898        | 0.13 (-0.04 to 0.31)        | 0.136        | -                          |                  |
