# Supplementary material for: Genetic determinants of anti-malarial acquired immunity in a large multi-centre study
Source: Springer Nature journal article supplement (doi:10.1186/s12936-015-0833-x), 2015-08-27
Supplement: MOESM14 [file 9761536]

## ADDITIONAL FILE 14: SUPPLEMENTARY TABLES

### Genetic Determinants Of Anti-Malarial Acquired Immunity In A Large Multi-Centre Study

Jennifer M.G. Shelton, Patrick Corran, Paul Risley, Nilupa Silva, Christina Hubbart, Anna Jeffreys, Kate Rowlands, Rachel Craik, Victoria Cornelius, Meike Hensmann, Sile Molloy, Nuno Sepulveda, Taane G. Clark, Gavin Band, Geraldine M. Clarke, Christopher C.A. Spencer, Angeliki Kerasidou, Susana Campino, Sarah Auburn, Adama Tall, Alioune Badara Ly, Odile Mercereau-Puijalon, Anavaj Sakuntabhai, Abdoulaye Djimde, Boubacar Maiga, Ousmane Toure, Ogobara Doumbo, Amagana Dolo, Marita Troye-Blomberg, Valentina D. Mangano, Frederica Verra, David Modiano, Edith Bougouma, Sodiomon B. Sirima, Muntaser Ibrahim, Ayman Hussain, Nahid Eid, Abier Elzein, Hiba Mohamed, Ahmed Elhassan, Ibrahim Elhassan, Thomas N. Williams, Carolyne Ndila, Alexander Macharia, Kevin Marsh, Alphaxard Manjurano, Hugh Reyburn, Martha Lemnge, Deus Ishengoma, Richard Carter, Nadira Karunaweera, Deepika Fernando, Rajika Dewasurendra, Christopher J. Drakeley, Eleanor M. Riley, Dominic P. Kwiatkowski, and Kirk A. Rockett, in collaboration with the MalariaGEN Consortium,

Corresponding authors Kirk A. Rockett and Dominic P. Kwiatkowski  
Wellcome Trust Centre for Human Genetics, University of Oxford, Roosevelt Drive, Oxford, UK

This file contains **Additional Table ST8: Results of linear regression analysis investigating the effect of age, gender, malaria status as determined by microscopy and bednet use\* on logged antibody levels to AMA1, MSP1, MSP2, NANP and IgE**. Results shown as betas, which indicate the direction of effect of the clinical covariate on antibody levels. Beta<0 indicate a decrease in antibody levels and beta>0 indicate an increase in antibody levels. 95% confidence intervals that do not span 0 indicate an effect that is significant at p=0.05. Data from Mali (Pongonon), Mali (Manteourou), Sudan and Tanzania (Moshi) are not included as bednet usage was not recorded at these sites.

**Additional Table ST8: Results of linear regression analysis investigating the effect of age, gender, malaria status as determined by microscopy and bednet use\* on logged antibody levels to AMA1, MSP1, MSP2, NANP and IgE.** Results shown as betas, which indicate the direction of effect of the clinical covariate on antibody levels. Beta<0 indicate a decrease in antibody levels and beta>0 indicate an increase in antibody levels. 95% confidence intervals that do not span 0 indicate an effect that is significant at p=0.05. Data from Mali (Pongonon), Mali (Manteourou), Sudan and Tanzania (Moshi) are not included as bednet usage was not recorded at these sites.

| Factor                   | anti-AMA1 levels (n=5105)     |                  | anti-MSP1 levels (n=5280)     |                  | anti-MSP2 levels (n=5365)     |                  | anti-NANP levels (n=5294)     |                  | total IgE levels (n=4751)  |                  |
|--------------------------|-------------------------------|------------------|-------------------------------|------------------|-------------------------------|------------------|-------------------------------|------------------|----------------------------|------------------|
|                          | beta (95% CI)                 | p-value          | beta (95% CI)                 | p-value          | beta (95% CI)                 | p-value          | beta (95% CI)                 | p-value          | beta (95% CI)              | p-value          |
| <i>Age (years)</i>       |                               |                  |                               |                  |                               |                  |                               |                  |                            |                  |
| <1                       | 0                             |                  | 0                             |                  | 0                             |                  | 0                             |                  | 0                          |                  |
| 1-2                      | 0.27 (-0.09 to 0.64)          | 0.137            | -0.12 (-0.40 to 0.16)         | 0.418            | <b>0.34 (0.06 to 0.63)</b>    | <b>0.017</b>     | <b>0.26 (0.01 to 0.52)</b>    | <b>0.044</b>     | 0.07 (-0.20 to 0.33)       | 0.630            |
| 2-5                      | <b>0.84 (0.56 to 1.12)</b>    | <b>&lt;0.001</b> | 0.07 (-0.15 to 0.29)          | 0.520            | <b>0.75 (0.53 to 0.98)</b>    | <b>&lt;0.001</b> | <b>0.44 (0.23 to 0.64)</b>    | <b>&lt;0.001</b> | 0.08 (-0.14 to 0.29)       | 0.483            |
| 5-15                     | <b>1.28 (1.01 to 1.55)</b>    | <b>&lt;0.001</b> | <b>0.43 (0.22 to 0.64)</b>    | <b>&lt;0.001</b> | <b>1.25 (1.04 to 1.46)</b>    | <b>&lt;0.001</b> | <b>0.89 (0.70 to 1.09)</b>    | <b>&lt;0.001</b> | <b>0.21 (0 to 0.42)</b>    | <b>0.048</b>     |
| 15-30                    | <b>1.03 (0.76 to 1.30)</b>    | <b>&lt;0.001</b> | <b>0.61 (0.39 to 0.82)</b>    | <b>&lt;0.001</b> | <b>1.23 (1.02 to 1.45)</b>    | <b>&lt;0.001</b> | <b>1.45 (1.25 to 1.64)</b>    | <b>&lt;0.001</b> | <b>0.24 (0.03 to 0.45)</b> | <b>0.023</b>     |
| >30                      | <b>0.89 (0.62 to 1.17)</b>    | <b>&lt;0.001</b> | <b>0.76 (0.54 to 0.97)</b>    | <b>&lt;0.001</b> | <b>1.18 (0.96 to 1.39)</b>    | <b>&lt;0.001</b> | <b>1.64 (1.45 to 1.84)</b>    | <b>&lt;0.001</b> | 0.16 (-0.05 to 0.38)       | 0.131            |
| <i>Gender</i>            |                               |                  |                               |                  |                               |                  |                               |                  |                            |                  |
| Female                   | 0                             |                  | 0                             |                  | 0                             |                  | 0                             |                  | 0                          |                  |
| Male                     | <b>-0.07 (-0.13 to -0.02)</b> | <b>0.009</b>     | <b>-0.14 (-0.18 to -0.09)</b> | <b>&lt;0.001</b> | <b>-0.11 (-0.15 to -0.06)</b> | <b>&lt;0.001</b> | <b>-0.07 (-0.11 to -0.03)</b> | <b>0.001</b>     | <b>0.12 (0.09 to 0.16)</b> | <b>&lt;0.001</b> |
| <i>Microscopy result</i> |                               |                  |                               |                  |                               |                  |                               |                  |                            |                  |
| Negative                 | 0                             |                  | 0                             |                  | 0                             |                  | 0                             |                  | 0                          |                  |
| Positive                 | <b>0.17 (0.09 to 0.24)</b>    | <b>&lt;0.001</b> | <b>0.07 (0.01 to 0.12)</b>    | <b>0.026</b>     | <b>0.24 (0.18 to 0.30)</b>    | <b>&lt;0.001</b> | -0.03 (-0.08 to 0.03)         | 0.331            | <b>0.06 (0.01 to 0.11)</b> | <b>0.018</b>     |
| <i>Bednet in use</i>     |                               |                  |                               |                  |                               |                  |                               |                  |                            |                  |
| No                       | 0                             |                  | 0                             |                  | 0                             |                  | 0                             |                  | 0                          |                  |
| Yes                      | -0.01 (-0.10 to -0.07)        | 0.759            | 0.02 (-0.05 to 0.08)          | 0.640            | -0.04 (-0.11 to 0.03)         | 0.249            | 0.03 (-0.03 to 0.09)          | 0.327            | -0.02 (-0.08 to 0.04)      | 0.576            |

NB: CI = confidence interval; results significant at 0.05 level are highlighted in bold.

\* Also adjusted for village (>20), ethnicity (>20), sample month (>20) and study; results not shown but ANOVA p-values were <0.001 for all antibodies.
