# Supplementary material for: Genetic determinants of anti-malarial acquired immunity in a large multi-centre study
Source: Springer Nature journal article supplement (doi:10.1186/s12936-015-0833-x), 2015-08-27
Supplement: MOESM15 [file 9761536]

## ADDITIONAL FILE 15: SUPPLEMENTARY TABLES

### Genetic Determinants Of Anti-Malarial Acquired Immunity In A Large Multi-Centre Study

Jennifer M.G. Shelton, Patrick Corran, Paul Risley, Nilupa Silva, Christina Hubbart, Anna Jeffreys, Kate Rowlands, Rachel Craik, Victoria Cornelius, Meike Hensmann, Sile Molloy, Nuno Sepulveda, Taane G. Clark, Gavin Band, Geraldine M. Clarke, Christopher C.A. Spencer, Angeliki Kerasidou, Susana Campino, Sarah Auburn, Adama Tall, Alioune Badara Ly, Odile Mercereau-Puijalon, Anavaj Sakuntabhai, Abdoulaye Djimde, Boubacar Maiga, Ousmane Toure, Ogobara Doumbo, Amagana Dolo, Marita Troye-Blomberg, Valentina D. Mangano, Frederica Verra, David Modiano, Edith Bougouma, Sodiomon B. Sirima, Muntaser Ibrahim, Ayman Hussain, Nahid Eid, Abier Elzein, Hiba Mohamed, Ahmed Elhassan, Ibrahim Elhassan, Thomas N. Williams, Carolyne Ndila, Alexander Macharia, Kevin Marsh, Alphaxard Manjurano, Hugh Reyburn, Martha Lemnge, Deus Ishengoma, Richard Carter, Nadira Karunaweera, Deepika Fernando, Rajika Dewasurendra, Christopher J. Drakeley, Eleanor M. Riley, Dominic P. Kwiatkowski, and Kirk A. Rockett, in collaboration with the MalariaGEN Consortium,

Corresponding authors Kirk A. Rockett and Dominic P. Kwiatkowski  
Wellcome Trust Centre for Human Genetics, University of Oxford, Roosevelt Drive, Oxford, UK

This file contains **Additional Table ST9: Details of 196 genotyped SNPs and their derived allele frequencies at each site.** SNPs are shown in chromosome order. SNPs not shown if they were gender-determining (n=3) or had an assay pass rate <80% (n=3).  
SE: Senegal; DP Mali (Pongonon) and DQ Mali (Manteourou); BJ Burkina Faso; SA Sudan; KM; Kenya; TN Tanzaniaia (Moshi); TG Tanga (SP2); TP Tanga (SP1) and SL Sri Lanka.

**Additional Table ST9: Details of 196 genotyped SNPs and their derived allele frequencies at each site.** SNPs are shown in chromosome order. SNPs not shown if they were gender-determining (n=3) or had an assay pass rate <80% (n=3). SE: Senegal; DP Mali (Pongonon) and DQ Mali (Manteourou); BJ Burkina Faso; SA Sudan; KM; Kenya; TN Tanzania (Moshi); TG Tanga (SP2); TP Tanga (SP1) and SL Sri Lanka.

| rs number  | gene      | chr | coordinate | West Africa |       |       |       | East Africa |       |       |       |       | Asia  |
|------------|-----------|-----|------------|-------------|-------|-------|-------|-------------|-------|-------|-------|-------|-------|
|            |           |     |            | SE          | DP    | DQ    | BJ    | SA          | KM    | TN    | TG    | TP    | SL    |
| rs1803632  | GBP7      | 1   | 89582690   | 56.54       | 51.29 | 54.6  | 53.44 | 40.48       | 52.02 | 50.79 | 50.55 | 52.66 | 64.74 |
| rs2814778  | DARC      | 1   | 159174683  | 100         | 100   | 100   | 99.71 | 100         | 99.97 | 99.09 | 99    | 99.68 | 0     |
| rs2251746  | FCER1A    | 1   | 159272060  | 5.93        | 3.71  | 8.64  | 5.1   | 2.38        | 11.85 | 10.33 | 9.85  | 8.94  | 26.26 |
| rs1801274  | FCGR2a    | 1   | 161479745  | 43.08       | 60.59 | 59.11 | 63.41 | 48.63       | 60.23 | 56.54 | 60.14 | 57.22 | 44.1  |
| rs10127939 | CD16      | 1   | 161518333  | 9.51        | 11.53 | 11.8  | 6.1   | 5.13        | 4.73  | 3.64  | 4.27  | 3.19  | 3.85  |
| rs3024500  | IL10      | 1   | 206940831  | 33.9        | 38.94 | 33.23 | 36.98 | 51.85       | 52.63 | 48.13 | 47.52 | 48.56 | 20.89 |
| rs1518110  | IL10      | 1   | 206944861  | 54.08       | 50.33 | 52.73 | 50.98 | 36.49       | 34.55 | 38.03 | 41.21 | 37.56 | 47.54 |
| rs1800872  | IL10      | 1   | 206946407  | 54.41       | 50.32 | 53.04 | 50.98 | 37.5        | 34.62 | 38.12 | 41.67 | 37.6  | 51.32 |
| rs1800871  | IL10      | 1   | 206946634  | 54.17       | 50.33 | 52.96 | 51.01 | 38.31       | 34.45 | 37.96 | 41.55 | 37.56 | 51.26 |
| rs1800896  | IL10      | 1   | 206946897  | 30.75       | 30.45 | 29.78 | 30.66 | 42.26       | 36.41 | 33.58 | 32.34 | 34.43 | 19.82 |
| rs1800890  | IL10      | 1   | 206949365  | 20.02       | 21.63 | 16.64 | 17.03 | 22.62       | 23.66 | 22.77 | 23.32 | 22.15 | 15.54 |
| rs17047660 | CR1       | 1   | 207782856  | 41.83       | 34.95 | 35.96 | 32.75 | 40.96       | 16.44 | 24.76 | 20.49 | 21.89 | 0     |
| rs17047661 | CR1       | 1   | 207782889  | 79.33       | 73.06 | 69.3  | 73.01 | 76.19       | 67.26 | 59.15 | 62.36 | 62.46 | 0.19  |
| rs17561    | IL1A      | 2   | 113537223  | 18.15       | 21.63 | 26.98 | 17.03 | 17.86       | 17.7  | 18.74 | 18.3  | 20.1  | 31.41 |
| rs1800587  | IL1A      | 2   | 113542960  | 41.73       | 51.8  | 50.24 | 42.95 | 35.53       | 37.21 | 39.42 | 37.55 | 41.6  | 29.69 |
| rs1143634  | IL1B      | 2   | 113590390  | 11.52       | 12.7  | 19.3  | 11.44 | 12.5        | 12.67 | 14.65 | 9.51  | 12.94 | 13.19 |
| rs708567   | IL1RE     | 3   | 9960070    | 41.77       | 55.14 | 50.71 | 45.91 | 48.72       | 48.4  | 50.84 | 49.9  | 50.75 | 31.58 |
| rs352140   | TLR9      | 3   | 52231737   | 77.32       | 78.46 | 70.56 | 73.32 | 69.05       | 66.05 | 68.73 | 66.45 | 68.39 | 61.44 |
| rs187084   | TLR9      | 3   | 52261031   | 73.39       | 73.4  | 73.56 | 71.92 | 71.6        | 66.53 | 71.41 | 68.36 | 68.06 | 66.86 |
| rs6780995  | IL17RD    | 3   | 57138419   | 59.21       | 57.53 | 60.88 | 57.87 | 56.55       | 58.03 | 56.61 | 56.96 | 57.06 | 75.82 |
| rs4833095  | TLR1      | 4   | 38799710   | 12.9        | 11.15 | 11.15 | 9.98  | 8.43        | 9.39  | 7.96  | 9.48  | 9.89  | 49.56 |
| rs5743611  | TLR1      | 4   | 38800214   | 0           | 0     | 0     | 0     | 0           | 0     | 0     | 0     | 0     | 0.06  |
| rs5743810  | TLR6      | 4   | 38830350   | 0.5         | 0.97  | 4.25  | 1.45  | 0           | 1.74  | 3.12  | 1.09  | 2.18  | 1     |
| rs5743809  | TLR6      | 4   | 38830514   | 1.71        | 4.49  | 5.46  | 5.97  | 7.74        | 4.9   | 9.73  | 7.92  | 5.5   | 0     |
| rs4073     | IL8       | 4   | 74606024   | 14.85       | 8.77  | 11.97 | 15.14 | 6.25        | 14.15 | 17.48 | 16.03 | 16.42 | 61.42 |
| rs6897932  | IL7R      | 5   | 35874575   | 9.51        | 10.65 | 8.52  | 7.61  | 6.55        | 5     | 6.28  | 6.11  | 6.97  | 20.82 |
| rs3194051  | IL7R      | 5   | 35876274   | 31.02       | 33.06 | 29.83 | 31.67 | 28.26       | 25.7  | 27.3  | 28.52 | 24.36 | 19.68 |
| rs1801033  | C6        | 5   | 41199959   | 36.39       | 41.16 | 42.76 | 43.91 | 42.26       | 47.9  | 45.77 | 46.66 | 46.77 | 35.29 |
| rs2289276  | TSLP      | 5   | 110407507  | 15.89       | 11.85 | 18.07 | 14.84 | 12.99       | 8.75  | 13.07 | 12.45 | 12.74 | 39.62 |
| rs3091336  | IL3       | 5   | 131391749  | 70.18       | 65.11 | 73.4  | 72.92 | 68.45       | 77.14 | 79.51 | 75.59 | 81.02 | 100   |
| rs35415145 | IL3       | 5   | 131396406  | 2.04        | 2.27  | 2.44  | 0.75  | 3.7         | 3.38  | 2.18  | 4.11  | 1.54  | 0.06  |
| rs40401    | IL3       | 5   | 131396478  | 57.37       | 40.97 | 57.4  | 52.48 | 43.45       | 58.01 | 56.78 | 51.74 | 53.39 | 62.67 |
| rs35482671 | IL3       | 5   | 131396676  | 0           | 0     | 0     | 0     | 0           | 0     | 0     | 0     | 0     | 0     |
| rs13166954 | IL3       | 5   | 131396709  | 0           | 0     | 0     | 0     | 0           | 0     | 0.01  | 0     | 0     | 0     |
| rs31481    | IL3       | 5   | 131397202  | 11.54       | 13.62 | 7.78  | 11.83 | 20.63       | 15.99 | 18.8  | 19.95 | 20.19 | 36.32 |
| rs168681   | IL3       | 5   | 131402450  | 18.39       | 17.49 | 17.85 | 17.51 | 24.66       | 22.5  | 27.58 | 28.44 | 26.1  | 64.37 |
| rs2069614  | CSF2      | 5   | 131407601  | 41.97       | 43.55 | 50.16 | 45.68 | 62.2        | 54.93 | 55.14 | 55.57 | 55.08 | 92.6  |
| rs10072253 | CSF2      | 5   | 131409768  | 0           | 0     | 0     | 0     | 0           | 0     | 0.01  | 0     | 0     | 0     |
| rs2069640  | CSF2      | 5   | 131411454  | 0           | 0     | 0     | 0     | 0           | 0     | 0     | 0     | 0     | 0     |
| rs25882    | CSF2      | 5   | 131411460  | 30.43       | 35.99 | 25.51 | 28.79 | 37.2        | 31.81 | 29.15 | 27.57 | 26.81 | 34.22 |
| rs25887    | CSF2      | 5   | 131416061  | 48.36       | 45.97 | 51.25 | 49.36 | 42.77       | 49.44 | 44.69 | 45.35 | 47.81 | 36.91 |
| rs3805685  | P4HA2     | 5   | 131528153  | 9.13        | 11.54 | 4.12  | 8.1   | 8.02        | 6.24  | 7.58  | 8.71  | 7.61  | 2.01  |
| rs156029   | P4HA2     | 5   | 131532634  | 46.25       | 49.84 | 54.75 | 50.21 | 48.21       | 43.8  | 44.65 | 43.34 | 46.22 | 33.94 |
| rs159903   | P4HA2     | 5   | 131540053  | 22.47       | 27.17 | 25    | 23.03 | 29.11       | 19.1  | 18.13 | 18.6  | 16.88 | 19.3  |
| rs11955347 | P4HA2     | 5   | 131567924  | 26.67       | 26.6  | 35.02 | 25.37 | 31.25       | 24.75 | 35.02 | 27.19 | 33.23 | 7.14  |
| rs3900945  | PDLIM4    | 5   | 131592870  | 37.97       | 42.72 | 33.54 | 39.69 | 25.9        | 34.73 | 28.88 | 33.62 | 27.93 | 74.13 |
| rs10463891 | PDLIM4    | 5   | 131597392  | 38.53       | 42.23 | 33.64 | 39.85 | 25.6        | 34.93 | 29.05 | 33.95 | 27.47 | 74.02 |
| rs17851430 | PDLIM4    | 5   | 131606632  | 0           | 0     | 0     | 0     | 0           | 0     | 0     | 0     | 0     | 0     |
| rs156112   | PDLIM4    | 5   | 131610232  | 18.65       | 26.76 | 11.54 | 16.3  | 15.79       | 17.35 | 13.25 | 14.9  | 11.81 | 4.75  |
| rs398064   | SLC22A4   | 5   | 131647902  | 0           | 0     | 0     | 0     | 0           | 0     | 0     | 0     | 0     | 0     |
| rs11568510 | SLC22A4   | 5   | 131647954  | 0           | 0     | 0     | 0     | 0           | 0     | 0     | 0     | 0     | 0     |
| rs11568499 | SLC22A4   | 5   | 131649300  | 0           | 0     | 0     | 0     | 0           | 0     | 0     | 0     | 0     | 0     |
| rs455649   | SLC22A4   | 5   | 131649306  | 0           | 0     | 0     | 0     | 0           | 0     | 0.01  | 0     | 0     | 0     |
| rs272893   | SLC22A4   | 5   | 131663062  | 77.89       | 77.24 | 71.77 | 78.33 | 82.89       | 71.89 | 72.86 | 69.05 | 73.1  | 35.55 |
| rs2304081  | SLC22A4   | 5   | 131667548  | 3.85        | 2.44  | 7.94  | 4.05  | 3.16        | 4.7   | 5.51  | 4.64  | 5.82  | 2.89  |
| rs4646201  | SLC22A4   | 5   | 131671634  | 0.1         | 0     | 0     | 0     | 0           | 0     | 0     | 0     | 0     | 0     |
| rs272867   | SLC22A4   | 5   | 131681057  | 71.18       | 62.1  | 63.44 | 69.87 | 76.79       | 67.94 | 67.22 | 64.53 | 65.24 | 34.62 |
| rs11544587 | SLC22A5   | 5   | 131706005  | 0           | 0     | 0     | 0     | 0           | 0     | 0     | 0     | 0     | 0     |
| rs10040427 | SLC22A5   | 5   | 131714106  | 10.98       | 9.63  | 5.01  | 8.93  | 3.62        | 9.33  | 8.28  | 9.98  | 9.18  | 0     |
| rs4551059  | SLC22A5   | 5   | 131719999  | 0           | 0     | 0     | 0     | 0           | 0     | 0     | 0     | 0     | 0     |
| rs11568525 | SLC22A5   | 5   | 131729935  | 6.46        | 10.97 | 7.72  | 6.37  | 2.38        | 2.75  | 3.41  | 2.64  | 3.95  | 0     |
| rs7704457  | LOC441108 | 5   | 131744790  | 14.15       | 14.95 | 16.24 | 18.08 | 19.88       | 23.43 | 15.24 | 18.41 | 12.89 | 38.91 |
| rs6874639  | LOC441108 | 5   | 131778716  | 31.64       | 34.41 | 33.23 | 34.13 | 25.31       | 23.45 | 21.04 | 22.5  | 20.89 | 39.46 |

|            |           |   |           |       |       |       |       |       |       |       |       |       |       |
|------------|-----------|---|-----------|-------|-------|-------|-------|-------|-------|-------|-------|-------|-------|
| rs2522051  | LOC441108 | 5 | 131797578 | 68.35 | 59.55 | 67.71 | 59.59 | 63.97 | 57.46 | 57.34 | 61.1  | 56.81 | 14.02 |
| rs2706379  | LOC441108 | 5 | 131805735 | 22.82 | 33.17 | 27.49 | 30.45 | 26.19 | 24.86 | 25.95 | 23.63 | 21.85 | 37.91 |
| rs2706381  | LOC441108 | 5 | 131810619 | 22.47 | 31.03 | 25.9  | 29.45 | 26.19 | 24.79 | 24.91 | 23.59 | 22.4  | 37.69 |
| rs2070729  | IRF1      | 5 | 131819921 | 29.94 | 29.84 | 37.75 | 34.89 | 22.02 | 26.46 | 25.46 | 26.87 | 26.17 | 32.91 |
| rs2070724  | IRF1      | 5 | 131822072 | 37.32 | 43.23 | 52.95 | 52.81 | 45.06 | 39.83 | 41.35 | 40.64 | 40.44 | 57.35 |
| rs2070722  | IRF1      | 5 | 131824486 | 37.34 | 43.54 | 53.02 | 53.14 | 48.33 | 39.59 | 40.63 | 40.2  | 39.51 | 57.29 |
| rs2706384  | IRF1      | 5 | 131826880 | 33.23 | 37.9  | 49.53 | 47.4  | 46.25 | 36.81 | 39.22 | 38.1  | 37.77 | 57.99 |
| rs2548999  | IRF1      | 5 | 131831058 | 34.69 | 39.55 | 46.26 | 44.81 | 44.51 | 38.53 | 39.96 | 37.34 | 38.69 | 58.71 |
| rs739718   | IL5       | 5 | 131873073 | 23.59 | 28.55 | 25.82 | 29.26 | 29.23 | 29.75 | 33.02 | 32.04 | 34.03 | 2.3   |
| rs2069818  | IL5       | 5 | 131877524 | 8.98  | 8.68  | 11.14 | 10.18 | 5.95  | 5.25  | 5.43  | 6.02  | 6.7   | 0     |
| rs2069823  | IL5       | 5 | 131877699 | 0     | 0     | 0     | 0     | 0     | 0     | 0     | 0     | 0     | 0     |
| rs4526098  | RAD50     | 5 | 131892979 | 76.47 | 67.68 | 84.37 | 79.13 | 75.31 | 73.98 | 75.26 | 75.45 | 80.84 | 98.49 |
| rs2706348  | RAD50     | 5 | 131905810 | 33.92 | 35.94 | 50.83 | 46.49 | 40.41 | 31.54 | 37.83 | 38.32 | 37.42 | 80.09 |
| rs28903086 | RAD50     | 5 | 131915022 | 0     | 0     | 0     | 0     | 1.35  | 0     | 0.01  | 0     | 0     | 0     |
| rs28903088 | RAD50     | 5 | 131915673 | 0     | 0     | 0     | 0     | 0.68  | 0     | 0.01  | 0     | 0     | 0     |
| rs10479007 | RAD50     | 5 | 131917726 | 22.87 | 15.74 | 11.29 | 17.71 | 19.18 | 14.21 | 11.54 | 13.7  | 12.16 | 0     |
| rs28903090 | RAD50     | 5 | 131923673 | 0     | 0     | 0     | 0     | 0     | 0     | 0     | 0     | 0     | 0     |
| rs1047380  | RAD50     | 5 | 131930613 | 0     | 0     | 0     | 0     | 0     | 0     | 0     | 0     | 0     | 0     |
| rs1047382  | RAD50     | 5 | 131931385 | 0     | 0     | 0     | 0     | 0     | 0     | 0     | 0     | 0     | 0     |
| rs28903092 | RAD50     | 5 | 131931472 | 0     | 0     | 0     | 0     | 0     | 1.54  | 0.31  | 0.45  | 0.24  | 0     |
| rs28903093 | RAD50     | 5 | 131940498 | 0     | 0     | 0     | 0     | 0     | 0     | 0     | 0     | 0     | 0     |
| rs1047386  | RAD50     | 5 | 131944869 | 0     | 0     | 0     | 0     | 0     | 0     | 0     | 0     | 0     | 0     |
| rs1047387  | RAD50     | 5 | 131951770 | 0     | 0     | 0     | 0     | 0     | 0     | 0     | 0     | 0     | 0     |
| rs17772565 | RAD50     | 5 | 131952405 | 9.6   | 15.22 | 17.88 | 15.16 | 9.88  | 9.62  | 11.75 | 9.71  | 11.15 | 7.8   |
| rs3798134  | RAD50     | 5 | 131965179 | 44.57 | 34.19 | 35.51 | 35.42 | 34    | 44.15 | 38.4  | 39.85 | 46.39 | 19.29 |
| rs35861031 | RAD50     | 5 | 131976461 | 0     | 0     | 0     | 0     | 0     | 0     | 0     | 0     | 0     | 0     |
| rs1804669  | RAD50     | 5 | 131978166 | 0     | 0     | 0     | 0     | 0     | 0     | 0     | 0     | 0     | 0     |
| rs4621555  | RAD50     | 5 | 131982808 | 76.21 | 86.82 | 89.88 | 84.41 | 84.34 | 89.79 | 92.57 | 90.46 | 93.45 | 100   |
| rs1881457  | IL13      | 5 | 131992409 | 20.94 | 16.67 | 17.27 | 15.5  | 10.87 | 27.18 | 23.4  | 22.65 | 26.34 | 18.37 |
| rs2069744  | IL13      | 5 | 131994669 | 42.47 | 38.26 | 19.39 | 29.2  | 41.57 | 30.22 | 33.35 | 34.96 | 36.35 | 0.34  |
| rs20541    | IL13      | 5 | 131995964 | 13.97 | 18.67 | 18    | 13.89 | 16.46 | 20.57 | 20.11 | 18.51 | 21.63 | 27.8  |
| rs848      | IL13      | 5 | 131996500 | 41.55 | 48.88 | 62.79 | 52.41 | 40    | 49.83 | 49.83 | 48.27 | 47.15 | 74.09 |
| rs2243206  | IL13      | 5 | 132001065 | 19.96 | 14.84 | 15.1  | 17.33 | 27.56 | 13.15 | 8.93  | 10.55 | 8.33  | 0     |
| rs2243248  | IL4       | 5 | 132008644 | 10.16 | 13.44 | 14.91 | 14.3  | 18.84 | 23.95 | 21.85 | 18.8  | 25.21 | 10.47 |
| rs2243250  | IL4       | 5 | 132009154 | 74.09 | 77.78 | 64.08 | 74.17 | 75.6  | 78.72 | 72.09 | 76.72 | 71.51 | 17.76 |
| rs2243251  | IL4       | 5 | 132009787 | 17.89 | 19.06 | 16.74 | 17.11 | 6.72  | 21.94 | 17.03 | 18.78 | 21.17 | 0     |
| rs4986964  | IL4       | 5 | 132009821 | 0     | 0     | 0     | 0     | 0     | 0.03  | 0     | 0     | 0     | 0     |
| rs2243270  | IL4       | 5 | 132014109 | 31.34 | 23.79 | 30.73 | 24.75 | 21.95 | 26.38 | 32.22 | 27.41 | 33.58 | 80.05 |
| rs2243283  | IL4       | 5 | 132016593 | 24.95 | 21.45 | 19.17 | 21.91 | 30.25 | 16.99 | 19.39 | 21.44 | 18.04 | 0.63  |
| rs3212227  | IL12B     | 5 | 158742950 | 31.05 | 43.39 | 32.6  | 35.11 | 26.09 | 39.14 | 40.2  | 35.74 | 40.6  | 38.59 |
| rs919766   | IL12B     | 5 | 158747564 | 29.82 | 19.23 | 23.72 | 27.79 | 29.38 | 27.9  | 20.95 | 23.14 | 21.96 | 6.27  |
| rs3181216  | IL12B     | 5 | 158752978 | 19.33 | 16.99 | 18.25 | 16.83 | 10.63 | 11.43 | 15.16 | 17.61 | 16.64 | 33.25 |
| rs730691   | IL12B     | 5 | 158756227 | 41.28 | 26.77 | 39.42 | 37.6  | 44.44 | 30.94 | 38.86 | 40.55 | 38    | 54.38 |
| rs2239704  | LTA       | 6 | 31540141  | 43.76 | 40.91 | 38.79 | 35.05 | 17.26 | 11.19 | 15.45 | 16.3  | 16.02 | 37.89 |
| rs909253   | LTA       | 6 | 31540313  | 37.55 | 37.02 | 38.69 | 37.72 | 53.57 | 48.78 | 54.96 | 55.72 | 53.95 | 29.02 |
| rs1799964  | TNF       | 6 | 31542308  | 12.8  | 15.54 | 17.13 | 18.47 | 22.02 | 27.93 | 23.77 | 21.14 | 23.75 | 32.62 |
| rs1800750  | TNF       | 6 | 31542963  | 1.11  | 1.21  | 2.8   | 3.11  | 2.38  | 4.83  | 4.28  | 2.49  | 3.54  | 0.5   |
| rs1800629  | TNF       | 6 | 31543031  | 17.2  | 11.86 | 8.16  | 12.7  | 5.95  | 8.87  | 8.99  | 9.87  | 9.39  | 9.85  |
| rs361525   | TNF       | 6 | 31543101  | 5.84  | 2.24  | 5.21  | 5.4   | 4.17  | 6.78  | 10.11 | 6.34  | 8.27  | 8.52  |
| rs3093662  | TNF       | 6 | 31544189  | 9.86  | 3.37  | 7.82  | 10.55 | 7.83  | 11.63 | 11.93 | 8.61  | 9.41  | 9.3   |
| rs2242665  | CTL4      | 6 | 31839309  | 66.63 | 65.53 | 71.14 | 72.68 | 69.05 | 74.82 | 78.77 | 77.59 | 79.85 | 51.13 |
| rs1555498  | IL2ORA    | 6 | 137325847 | 53.84 | 34.78 | 45.55 | 43.56 | 50    | 49.03 | 43.89 | 50.45 | 45.18 | 99.94 |
| rs11575936 | IFNGR1    | 6 | 137540425 | 0     | 0     | 0     | 0     | 0.68  | 0     | 0     | 0     | 0     | 0     |
| rs2075820  | NOD1      | 7 | 30492237  | 44.14 | 39.71 | 38.23 | 36.85 | 43.45 | 38.52 | 33.91 | 32.08 | 34.59 | 41.85 |
| rs9942705  | GLI3      | 7 | 42445655  | 21.88 | 25    | 26    | 26.22 | 28.31 | 20.58 | 27.38 | 26.68 | 26.16 | 7.01  |
| rs17172181 | HECW      | 7 | 43283115  | 51.01 | 60.98 | 75    | 59.86 | 46.99 | 51.68 | 46.27 | 52.31 | 51.99 | 70.22 |
| rs17172184 | HECW      | 7 | 43286129  | 37.73 | 47.85 | 56.53 | 50.37 | 41.46 | 35.06 | 35.4  | 39.28 | 40.02 | 60.71 |
| rs7779749  | IZKF1     | 7 | 50418506  | 73.82 | 74.55 | 81.74 | 69.72 | 54.88 | 54.86 | 59.35 | 61.32 | 62.03 | 76.63 |
| rs10230385 | IZKF1     | 7 | 50452552  | 47.27 | 45.98 | 44.28 | 41.39 | 38.41 | 36.08 | 40.44 | 39.01 | 42.22 | 33.4  |
| rs6964823  | IZKF1     | 7 | 50460096  | 42.83 | 43.25 | 43.17 | 41.32 | 40.48 | 43.77 | 41.13 | 41.59 | 39.11 | 42.83 |
| rs4132601  | IZKF1     | 7 | 50470604  | 15.76 | 13.53 | 14.74 | 17.64 | 30.12 | 18.32 | 19.67 | 18.47 | 19.58 | 23.14 |
| rs11980407 | IZKF1     | 7 | 50471613  | 84.01 | 85    | 80.45 | 82.37 | 72.89 | 81.69 | 80.67 | 81.78 | 82.03 | 76.9  |
| rs6944602  | IZKF1     | 7 | 50473751  | 3.74  | 2.93  | 2.08  | 3.4   | 1.2   | 8.08  | 8.43  | 7.52  | 7.1   | 14    |
| rs4947535  | DDC       | 7 | 50531681  | 46.82 | 51.76 | 50.09 | 45.18 | 38.69 | 38.8  | 40.35 | 40.93 | 40.43 | 34.27 |
| rs11983581 | DDC       | 7 | 50532888  | 87.58 | 83.76 | 85.3  | 84.35 | 75.63 | 82.3  | 84.95 | 86.93 | 87.93 | 98.01 |
| rs11982772 | DDC       | 7 | 50533062  | 12.7  | 16.03 | 14.67 | 15.58 | 23.81 | 17.72 | 15.16 | 13.11 | 12.06 | 2.15  |
| rs11575527 | DDC       | 7 | 50534327  | 12.7  | 16.34 | 14.61 | 15.91 | 23.49 | 17.71 | 15.26 | 13.07 | 13.17 | 2.17  |
| rs11575522 | DDC       | 7 | 50535395  | 12.31 | 15.75 | 14.47 | 15.57 | 23.46 | 17.8  | 15.02 | 13.18 | 12.42 | 2.1   |
| rs11575518 | DDC       | 7 | 50535681  | 87.22 | 83.82 | 85.5  | 84.24 | 76.83 | 82.28 | 84.84 | 86.95 | 87.32 | 97.85 |
| rs11575483 | DDC       | 7 | 50544663  | 0.3   | 2.14  | 0.73  | 4.31  | 2.41  | 4.01  | 2.84  | 2.31  | 2.69  | 0     |
| rs11575387 | DDC       | 7 | 50567435  | 22.41 | 22.42 | 13.41 | 16.85 | 28.31 | 25.28 | 20.51 | 19.32 | 19    | 7.4   |

|             |         |    |           |       |       |       |       |       |       |       |       |       |       |
|-------------|---------|----|-----------|-------|-------|-------|-------|-------|-------|-------|-------|-------|-------|
| rs3779084   | DDC     | 7  | 50568735  | 22.36 | 21.85 | 11.87 | 16.52 | 29.01 | 26.2  | 20.55 | 18.87 | 19.61 | 13.94 |
| rs880028    | DDC     | 7  | 50570136  | 80.97 | 84.83 | 92.29 | 85.7  | 68.67 | 76.72 | 80.47 | 81.95 | 79.13 | 86.1  |
| rs6592961   | DDC     | 7  | 50572890  | 70.39 | 66.23 | 74.55 | 68.45 | 53.61 | 55.44 | 62.68 | 62.91 | 61.27 | 81.55 |
| rs7809758   | DDC     | 7  | 50573333  | 70.45 | 69.06 | 75.28 | 72.25 | 55.56 | 58.34 | 64.86 | 65.19 | 63.33 | 70.08 |
| rs1817074   | DDC     | 7  | 50574012  | 68.7  | 65.53 | 73.46 | 67.57 | 50    | 54.18 | 61.85 | 61.97 | 60.14 | 68.05 |
| rs10271341  | DDC     | 7  | 50591583  | 24.79 | 37.46 | 35.27 | 31.63 | 15.85 | 14.27 | 14.33 | 13.59 | 13.63 | 29.01 |
| rs11575320  | DDC     | 7  | 50605298  | 24    | 36.07 | 33.49 | 31.51 | 13.75 | 14.06 | 13.3  | 13.14 | 12.56 | 23.96 |
| rs3779074   | DDC     | 7  | 50612202  | 42.52 | 59.62 | 46.93 | 51.99 | 44.05 | 43.61 | 42.94 | 42.03 | 40.82 | 42.41 |
| rs2044859   | DDC     | 7  | 50612562  | 42.46 | 59.48 | 47.32 | 52.06 | 43.9  | 43.62 | 43.15 | 41.96 | 41.21 | 42.98 |
| rs2329371   | DDC     | 7  | 50615440  | 24.56 | 35.64 | 33.62 | 29.42 | 15.24 | 13.49 | 13.35 | 12.78 | 13.04 | 34.96 |
| rs6956737   | DDC     | 7  | 50620781  | 10.77 | 11.73 | 5.19  | 13.55 | 16.87 | 17.97 | 18.4  | 17.9  | 16.69 | 2.23  |
| rs1451375   | DDC     | 7  | 50622712  | 14.99 | 20.17 | 11.31 | 24.39 | 14.63 | 17.88 | 16    | 16.08 | 15.24 | 39.73 |
| rs10249420  | DDC     | 7  | 50623451  | 13.94 | 20.42 | 14.66 | 22.52 | 12.05 | 13.05 | 12.88 | 12.22 | 12.27 | 28.76 |
| rs7803788   | DDC     | 7  | 50625898  | 13.62 | 18.17 | 9.39  | 23.09 | 11.11 | 14.54 | 13.13 | 12.96 | 13.01 | 27.92 |
| rs6593010   | DDC     | 7  | 50629888  | 72.1  | 56.63 | 63.34 | 62.82 | 63.25 | 66.27 | 64.25 | 67.67 | 64.01 | 57.87 |
| rs7800827   | DDC     | 7  | 50673171  | 18.28 | 8.06  | 9.96  | 7.89  | 9.04  | 9.2   | 9.87  | 8.47  | 6.55  | 0     |
| rs3211938   | CD36    | 7  | 80300449  | 0.7   | 61.93 | 36.63 | 16.5  | 9.64  | 9.76  | 2.69  | 8.33  | 5.63  | 0     |
| rs201346212 | CD36    | 7  | 80302110  | 0.6   | 1.29  | 0.16  | 2.02  | 0     | 0     | 0     | 0     | 0     | 0     |
| rs17140229  | CFTR    | 7  | 117230283 | 35.05 | 37.22 | 34.46 | 38.26 | 30.36 | 33.62 | 25.98 | 28.18 | 30.13 | 0     |
| rs4986790   | TLR4    | 9  | 120475302 | 7.39  | 9.42  | 6.22  | 8.5   | 14.2  | 4.26  | 7.9   | 4.55  | 5     | 16.37 |
| rs4986791   | TLR4    | 9  | 120475602 | 0.81  | 2.24  | 0.54  | 0.88  | 1.79  | 0.55  | 0.75  | 0.54  | 0.56  | 14.2  |
| rs8176746   | ABO     | 9  | 136131322 | 16.83 | 20.85 | 18.21 | 21.09 | 20.24 | 14.45 | 14.03 | 11.26 | 11.53 | 16.88 |
| rs8176719   | ABO     | 9  | 136132909 | 67.2  | 67.63 | 68.2  | 64.48 | 69.05 | 73.11 | 72.55 | 73.95 | 75.88 | 67.09 |
| rs33950507  | HBB     | 11 | 5248173   | 0     | 0     | 0     | 0     | 0     | 0     | 0     | 0     | 0     | 0     |
| rs334       | HBB     | 11 | 5248232   | 4.33  | 3.53  | 1.48  | 4.55  | 7.74  | 7.3   | 1.64  | 7.07  | 5.65  | 0.44  |
| rs33930165  | HBB     | 11 | 5248233   | 0.71  | 9.18  | 2.03  | 10.16 | 0     | 0.03  | 0     | 0     | 0     | 0     |
| rs7935564   | TRIM5   | 11 | 5718517   | 48.99 | 43.91 | 49.6  | 53.59 | 61.88 | 44.36 | 46.49 | 45.28 | 46.24 | 51.31 |
| rs569108    | MS4A2   | 11 | 59863104  | 15.11 | 19.29 | 17.47 | 20.07 | 23.49 | 21.7  | 23.75 | 27.87 | 26.58 | 6.12  |
| rs542998    | RTN3    | 11 | 63487386  | 42.14 | 32.74 | 45.36 | 45.65 | 36.14 | 46.15 | 38    | 37.22 | 38.51 | 70.47 |
| rs3024978   | STAT6   | 12 | 57490378  | 0     | 0     | 0     | 0     | 0     | 0.42  | 0.39  | 1.27  | 0.4   | 0     |
| rs12314983  | STAT6   | 12 | 57492308  | 4.46  | 1.93  | 2.11  | 2.39  | 1.23  | 0.31  | 0.56  | 0.55  | 0.4   | 0     |
| rs35182390  | STAT6   | 12 | 57493602  | 0     | 0     | 0     | 0     | 0.66  | 0     | 0     | 0     | 0     | 0.13  |
| rs3024952   | STAT6   | 12 | 57500112  | 0     | 0     | 0     | 0     | 0     | 0.19  | 0.49  | 0.18  | 0     | 0     |
| rs2626577   | STAT6   | 12 | 57500509  | 0     | 0     | 0     | 0.03  | 0     | 0     | 0     | 0     | 0     | 0     |
| rs2069727   | IFNG    | 12 | 68548223  | 9.94  | 15.58 | 19.45 | 18.41 | 11.04 | 18.07 | 20.07 | 19.06 | 23.18 | 39    |
| rs2234687   | IFNG    | 12 | 68548756  | 1.01  | 1.14  | 0.55  | 0.66  | 0     | 0.72  | 0.07  | 0     | 0.08  | 0     |
| rs2069718   | IFNG    | 12 | 68550162  | 24.59 | 35.31 | 37.46 | 42.13 | 38.14 | 38.67 | 41.14 | 41.93 | 44.17 | 43.33 |
| rs1861493   | IFNG    | 12 | 68551196  | 7.84  | 7.19  | 6.64  | 7.06  | 6.16  | 6.85  | 6.22  | 7.62  | 6.5   | 13.32 |
| rs2069705   | IFNG    | 12 | 68555011  | 42.42 | 52.31 | 52.34 | 59.22 | 69.44 | 58.86 | 58.28 | 57.36 | 58.82 | 70.44 |
| rs2227507   | IL22    | 12 | 68642647  | 3.82  | 1.77  | 1.01  | 2.69  | 4.17  | 4.59  | 3.31  | 3.45  | 3.95  | 0.06  |
| rs1012356   | IL22    | 12 | 68644618  | 52.74 | 55.02 | 46.57 | 47.06 | 43.45 | 45.18 | 48.82 | 47.01 | 48.22 | 34.48 |
| rs2227491   | IL22    | 12 | 68646521  | 72.68 | 70.74 | 60.82 | 63.93 | 60.24 | 56.31 | 58.63 | 56.2  | 58.35 | 43.07 |
| rs2227485   | IL22    | 12 | 68647713  | 52.02 | 53.23 | 44.87 | 45.36 | 38.1  | 40.01 | 40.75 | 38.72 | 39.07 | 34.23 |
| rs2227478   | IL22    | 12 | 68648622  | 73.89 | 73.95 | 62.77 | 61.62 | 59.52 | 59.11 | 59.84 | 57.08 | 56.76 | 60.92 |
| rs229587    | SPTB    | 14 | 65263300  | 22.41 | 35.42 | 36.83 | 37.07 | 40.96 | 33.63 | 36.64 | 34.77 | 32.07 | 53.32 |
| rs2230739   | ADCY9   | 16 | 4033436   | 23.59 | 13.02 | 20.86 | 18.94 | 13.86 | 8.55  | 8.02  | 10.33 | 8.13  | 26.19 |
| rs10775349  | ADCY9   | 16 | 4079823   | 22.17 | 14.1  | 27.15 | 20.75 | 21.43 | 21.01 | 26.36 | 23.71 | 23.09 | 91.65 |
| rs1805015   | IL4R    | 16 | 27374180  | 50.61 | 50    | 35.34 | 44.37 | 35.54 | 42.86 | 41.54 | 37.61 | 37.68 | 11.82 |
| rs5470      | HP      | 16 | 72088421  | 18.43 | 16.45 | 17.37 | 16.22 | 8     | 13.84 | 8.71  | 9.69  | 8.59  | 0     |
| rs2535611   | ADORA2B | 17 | 15861332  | 0.91  | 6.15  | 5.45  | 6.15  | 9.04  | 11.21 | 11.93 | 10.02 | 12.76 | 1.38  |
| rs2297518   | NOS2    | 17 | 26096597  | 13.46 | 7.56  | 14.9  | 12.3  | 9.04  | 13.89 | 17.26 | 18.27 | 16.77 | 13.95 |
| rs1800482   | NOS2    | 17 | 26128509  | 9.56  | 7.53  | 7.77  | 9.48  | 5.36  | 7.67  | 4.51  | 5.9   | 5.33  | 0     |
| rs2779249   | NOS2A   | 17 | 26128581  | 49.39 | 49.03 | 58.74 | 48.65 | 48.1  | 39.34 | 38.24 | 37.27 | 38.49 | 22.96 |
| rs9282799   | NOS2    | 17 | 26128728  | 5.53  | 11.09 | 5.37  | 6.49  | 8.93  | 2.74  | 4.23  | 4.35  | 4.58  | 0     |
| rs8078340   | NOS2    | 17 | 26129212  | 27.27 | 26.94 | 34.62 | 28.43 | 24.7  | 22.17 | 21.28 | 20.38 | 21.35 | 8.98  |
| rs373533    | EMR1    | 19 | 6919624   | 48.47 | 46.39 | 36.49 | 43.43 | 49.4  | 49.83 | 46.16 | 48.41 | 50.73 | 29.06 |
| rs461645    | EMR1    | 19 | 6919753   | 52.35 | 55.93 | 63.24 | 56.47 | 50    | 49.7  | 53.29 | 51.46 | 49.03 | 69.64 |
| rs35825847  | FCER2   | 19 | 7754284   | 1.12  | 1.12  | 0.78  | 0.05  | 0     | 0     | 0     | 0     | 0     | 0     |
| rs1799969   | ICAM1   | 19 | 10394792  | 0.1   | 0     | 0.39  | 1.01  | 0     | 0     | 0.03  | 0.27  | 0     | 2.26  |
| rs5498      | ICAM1   | 19 | 10395683  | 11.49 | 15.48 | 19.42 | 14.82 | 6.55  | 13.58 | 10.93 | 12.45 | 12.83 | 50.45 |
| rs8386      | GNAS    | 20 | 57485812  | 13.39 | 14.74 | 14.95 | 19.25 | 21.43 | 18.24 | 15.23 | 15.67 | 15.43 | 0.25  |
| rs1128127   | DERL3   | 22 | 24179132  | 61.38 | 48.54 | 49.36 | 52.11 | 64.46 | 45.59 | 50.04 | 47.31 | 47.68 | 35.63 |
