# Supplementary material for: Genetic determinants of anti-malarial acquired immunity in a large multi-centre study
Source: Springer Nature journal article supplement (doi:10.1186/s12936-015-0833-x), 2015-08-27
Supplement: MOESM16 [file 9761536]

## ADDITIONAL FILE 16: SUPPLEMENTARY TABLES

### Genetic Determinants Of Anti-Malarial Acquired Immunity In A Large Multi-Centre Study

Jennifer M.G. Shelton, Patrick Corran, Paul Risley, Nilupa Silva, Christina Hubbart, Anna Jeffreys, Kate Rowlands, Rachel Craik, Victoria Cornelius, Meike Hensmann, Sile Molloy, Nuno Sepulveda, Taane G. Clark, Gavin Band, Geraldine M. Clarke, Christopher C.A. Spencer, Angeliki Kerasidou, Susana Campino, Sarah Auburn, Adama Tall, Alioune Badara Ly, Odile Mercereau-Puijalon, Anavaj Sakuntabhai, Abdoulaye Djimde, Boubacar Maiga, Ousmane Toure, Ogobara Doumbo, Amagana Dolo, Marita Troye-Blomberg, Valentina D. Mangano, Frederica Verra, David Modiano, Edith Bougouma, Sodiomon B. Sirima, Muntaser Ibrahim, Ayman Hussain, Nahid Eid, Abier Elzein, Hiba Mohamed, Ahmed Elhassan, Ibrahim Elhassan, Thomas N. Williams, Carolyne Ndila, Alexander Macharia, Kevin Marsh, Alphaxard Manjurano, Hugh Reyburn, Martha Lemnge, Deus Ishengoma, Richard Carter, Nadira Karunaweera, Deepika Fernando, Rajika Dewasurendra, Christopher J. Drakeley, Eleanor M. Riley, Dominic P. Kwiatkowski, and Kirk A. Rockett, in collaboration with the MalariaGEN Consortium,

Corresponding authors Kirk A. Rockett and Dominic P. Kwiatkowski  
Wellcome Trust Centre for Human Genetics, University of Oxford, Roosevelt Drive, Oxford, UK

This file contains **Additional Table ST10: Meta-analysis p-values obtained for 178 SNPs passing QC criteria detailed in materials and methods.** For each SNP-antibody association the genetic model that gave the lowest meta analysis p-value is given. NAs were generated if the MAF was <1% or the SNP was monomorphic at the majority of sites.

**Additional Table ST10: Meta-analysis p-values obtained for 178 SNPs passing QC criteria detailed in materials and methods.** For each SNP-antibody association the genetic model that gave the lowest meta analysis p-value is given. NAs were generated if the MAF was <1% or the SNP was monomorphic at the majority of sites.

| rsnumber   | gene   | chr | coordinate | anti-AMA1 |       |                  |          | anti-MSP1 |       |                 |          | anti-MSP2 |       |                 |          | anti-(NANP) <sub>4</sub> |       |                  |          |
|------------|--------|-----|------------|-----------|-------|------------------|----------|-----------|-------|-----------------|----------|-----------|-------|-----------------|----------|--------------------------|-------|------------------|----------|
|            |        |     |            | model     | beta  | 95%CIs           | p-value  | model     | beta  | 95%CIs          | p-value  | model     | beta  | 95%CIs          | p-value  | model                    | beta  | 95%CIs           | p-value  |
| rs1803632  | GBP7   | 1   | 89582690   | recessive | -0.02 | (-0.05 to 0.01)  | 2.03E-01 | additive  | 0.01  | (-0.01 to 0.03) | 5.57E-01 | dominant  | 0.01  | (-0.02 to 0.04) | 3.88E-01 | dominant                 | 0.02  | (-0.02 to 0.06)  | 2.51E-01 |
| rs2814778  | DARC   | 1   | 159174683  | NA        | NA    | NA               | NA       | NA        | NA    | NA              | NA       | NA        | NA    | NA              | NA       | NA                       | NA    | NA               | NA       |
| rs2251746  | FCER1A | 1   | 159272060  | hetero    | 0.01  | (-0.03 to 0.04)  | 6.62E-01 | additive  | 0.03  | (0 to 0.06)     | 6.72E-02 | additive  | -0.02 | (-0.05 to 0.01) | 2.45E-01 | recessive                | 0.11  | (0 to 0.23)      | 5.25E-02 |
| rs1801274  | FCGR2A | 1   | 161479745  | additive  | -0.01 | (-0.03 to 0)     | 1.25E-01 | dominant  | -0.04 | (-0.07 to 0)    | 3.58E-02 | additive  | -0.02 | (-0.04 to 0)    | 3.36E-02 | hetero                   | 0.01  | (-0.02 to 0.04)  | 5.99E-01 |
| rs10127939 | CD16   | 1   | 161518333  | recessive | 0.64  | (-0.57 to 1.85)  | 2.98E-01 | hetero    | -0.03 | (-0.08 to 0.02) | 3.01E-01 | hetero    | -0.02 | (-0.07 to 0.02) | 3.20E-01 | recessive                | 0.37  | (-0.58 to 1.31)  | 4.44E-01 |
| rs3024500  | IL10   | 1   | 206940831  | hetero    | 0     | (-0.02 to 0.03)  | 8.66E-01 | additive  | 0     | (-0.02 to 0.02) | 7.92E-01 | hetero    | 0.02  | (0 to 0.05)     | 6.49E-02 | recessive                | -0.03 | (-0.07 to 0.01)  | 1.87E-01 |
| rs1518110  | IL10   | 1   | 206944861  | additive  | 0.01  | (-0.01 to 0.02)  | 5.92E-01 | dominant  | 0.01  | (-0.02 to 0.04) | 5.21E-01 | hetero    | 0.02  | (0 to 0.05)     | 9.41E-02 | hetero                   | 0.02  | (-0.01 to 0.05)  | 2.32E-01 |
| rs1800872  | IL10   | 1   | 206946407  | additive  | 0.01  | (-0.01 to 0.03)  | 5.35E-01 | dominant  | 0.01  | (-0.02 to 0.04) | 5.48E-01 | hetero    | 0.02  | (0 to 0.05)     | 8.37E-02 | hetero                   | 0.02  | (-0.01 to 0.06)  | 1.33E-01 |
| rs1800871  | IL10   | 1   | 206946634  | recessive | 0.01  | (-0.03 to 0.05)  | 5.94E-01 | dominant  | 0.01  | (-0.02 to 0.04) | 5.44E-01 | hetero    | 0.02  | (0 to 0.05)     | 1.01E-01 | hetero                   | 0.02  | (-0.01 to 0.06)  | 1.40E-01 |
| rs1800896  | IL10   | 1   | 206946897  | hetero    | -0.02 | (-0.05 to 0)     | 7.58E-02 | hetero    | -0.01 | (-0.03 to 0.02) | 6.57E-01 | hetero    | 0.01  | (-0.02 to 0.03) | 5.99E-01 | hetero                   | 0.01  | (-0.02 to 0.04)  | 5.38E-01 |
| rs1800890  | IL10   | 1   | 206949365  | hetero    | -0.02 | (-0.04 to 0.01)  | 2.80E-01 | hetero    | -0.01 | (-0.04 to 0.02) | 5.73E-01 | hetero    | -0.01 | (-0.04 to 0.02) | 5.35E-01 | hetero                   | -0.02 | (-0.05 to 0.02)  | 2.75E-01 |
| rs17047660 | CR1    | 1   | 207782856  | additive  | -0.02 | (-0.05 to 0)     | 6.37E-02 | recessive | -0.03 | (-0.09 to 0.03) | 3.13E-01 | additive  | -0.03 | (-0.05 to 0)    | 2.03E-02 | dominant                 | 0.03  | (-0.01 to 0.07)  | 9.53E-02 |
| rs17047661 | CR1    | 1   | 207782889  | dominant  | -0.03 | (-0.07 to 0.01)  | 1.94E-01 | recessive | -0.01 | (-0.04 to 0.02) | 4.41E-01 | additive  | -0.01 | (-0.03 to 0.01) | 1.58E-01 | dominant                 | 0.02  | (-0.04 to 0.08)  | 4.99E-01 |
| rs17561    | IL1A   | 2   | 113537223  | recessive | 0.02  | (-0.05 to 0.09)  | 5.40E-01 | dominant  | -0.01 | (-0.04 to 0.01) | 3.25E-01 | recessive | 0.04  | (-0.03 to 0.1)  | 2.39E-01 | hetero                   | -0.01 | (-0.04 to 0.03)  | 6.16E-01 |
| rs1800587  | IL1A   | 2   | 113542960  | additive  | -0.01 | (-0.03 to 0.01)  | 3.41E-01 | dominant  | 0.02  | (-0.01 to 0.05) | 1.47E-01 | additive  | 0.01  | (-0.01 to 0.03) | 2.89E-01 | dominant                 | 0.01  | (-0.02 to 0.05)  | 4.24E-01 |
| rs1143634  | IL1B   | 2   | 113590390  | dominant  | 0.03  | (0 to 0.06)      | 9.61E-02 | additive  | 0.01  | (-0.02 to 0.04) | 4.56E-01 | recessive | 0.05  | (-0.05 to 0.14) | 3.19E-01 | additive                 | -0.02 | (-0.06 to 0.01)  | 2.34E-01 |
| rs708567   | IL17RE | 3   | 9960070    | hetero    | 0.02  | (-0.01 to 0.04)  | 2.31E-01 | recessive | -0.02 | (-0.05 to 0.01) | 2.29E-01 | hetero    | -0.02 | (-0.05 to 0)    | 1.11E-01 | recessive                | -0.03 | (-0.07 to 0.01)  | 1.87E-01 |
| rs352140   | TLR9   | 3   | 52231737   | additive  | -0.01 | (-0.03 to 0.01)  | 2.20E-01 | hetero    | 0.02  | (-0.01 to 0.05) | 1.06E-01 | recessive | -0.01 | (-0.04 to 0.01) | 3.52E-01 | dominant                 | -0.03 | (-0.08 to 0.02)  | 2.64E-01 |
| rs187084   | TLR9   | 3   | 52261031   | hetero    | 0.02  | (-0.01 to 0.05)  | 1.73E-01 | hetero    | 0.01  | (-0.02 to 0.04) | 3.61E-01 | dominant  | 0     | (-0.04 to 0.05) | 9.05E-01 | dominant                 | 0.03  | (-0.02 to 0.09)  | 2.08E-01 |
| rs6780995  | IL17RD | 3   | 57138419   | hetero    | -0.02 | (-0.05 to 0.01)  | 1.16E-01 | recessive | 0.01  | (-0.02 to 0.04) | 5.89E-01 | recessive | 0.01  | (-0.02 to 0.04) | 5.07E-01 | recessive                | 0.03  | (-0.01 to 0.06)  | 1.42E-01 |
| rs4833095  | TLR1   | 4   | 38799710   | recessive | 0.03  | (-0.06 to 0.11)  | 5.26E-01 | dominant  | 0.02  | (-0.02 to 0.06) | 2.75E-01 | hetero    | 0.01  | (-0.02 to 0.05) | 4.30E-01 | recessive                | 0.01  | (-0.07 to 0.08)  | 8.86E-01 |
| rs5743611  | TLR1   | 4   | 38800214   | NA        | NA    | NA               | NA       | NA        | NA    | NA              | NA       | NA        | NA    | NA              | NA       | NA                       | NA    | NA               |          |
| rs5743810  | TLR6   | 4   | 38830350   | recessive | -0.35 | (-0.84 to 0.13)  | 1.50E-01 | hetero    | 0.05  | (-0.02 to 0.12) | 1.74E-01 | dominant  | 0.03  | (-0.03 to 0.09) | 3.94E-01 | additive                 | 0.08  | (-0.02 to 0.18)  | 1.26E-01 |
| rs5743809  | TLR6   | 4   | 38830514   | hetero    | -0.01 | (-0.05 to 0.03)  | 7.78E-01 | additive  | -0.01 | (-0.05 to 0.03) | 5.51E-01 | hetero    | -0.01 | (-0.05 to 0.03) | 5.08E-01 | hetero                   | -0.08 | (-0.14 to -0.02) | 1.41E-02 |
| rs4073     | IL8    | 4   | 74606024   | hetero    | -0.02 | (-0.05 to 0.02)  | 3.27E-01 | additive  | 0.01  | (-0.01 to 0.04) | 3.35E-01 | hetero    | 0.02  | (-0.01 to 0.05) | 2.54E-01 | hetero                   | 0.01  | (-0.03 to 0.04)  | 6.72E-01 |
| rs6897932  | IL7R   | 5   | 35874575   | additive  | 0.02  | (-0.02 to 0.05)  | 3.54E-01 | additive  | 0.02  | (-0.02 to 0.06) | 3.27E-01 | hetero    | 0.02  | (-0.01 to 0.06) | 2.24E-01 | recessive                | 0.04  | (-0.11 to 0.19)  | 5.91E-01 |
| rs3194051  | IL7R   | 5   | 35876274   | recessive | 0.01  | (-0.04 to 0.07)  | 6.19E-01 | recessive | 0.06  | (0.01 to 0.11)  | 2.64E-02 | recessive | -0.01 | (-0.06 to 0.04) | 5.94E-01 | recessive                | 0.04  | (-0.02 to 0.1)   | 2.07E-01 |
| rs1801033  | C6     | 5   | 41199959   | recessive | -0.03 | (-0.07 to 0)     | 7.97E-02 | hetero    | 0.04  | (0.01 to 0.07)  | 7.97E-03 | recessive | -0.02 | (-0.05 to 0.02) | 3.02E-01 | dominant                 | -0.03 | (-0.07 to 0)     | 8.09E-02 |
| rs2289276  | TSLP   | 5   | 110407507  | recessive | 0.11  | (0.03 to 0.19)   | 6.24E-03 | dominant  | 0.01  | (-0.03 to 0.04) | 7.16E-01 | hetero    | 0.01  | (-0.02 to 0.04) | 6.95E-01 | hetero                   | -0.02 | (-0.05 to 0.02)  | 4.27E-01 |
| rs3091336  | IL3    | 5   | 131391749  | dominant  | -0.05 | (-0.12 to 0.01)  | 9.48E-02 | hetero    | -0.02 | (-0.05 to 0.01) | 1.58E-01 | hetero    | -0.03 | (-0.06 to 0)    | 3.59E-02 | hetero                   | 0.03  | (-0.01 to 0.07)  | 9.69E-02 |
| rs35415145 | IL3    | 5   | 131396406  | hetero    | -0.03 | (-0.1 to 0.04)   | 4.18E-01 | hetero    | -0.06 | (-0.14 to 0.01) | 9.95E-02 | dominant  | -0.04 | (-0.11 to 0.02) | 2.12E-01 | additive                 | 0.02  | (-0.06 to 0.11)  | 5.60E-01 |
| rs40401    | IL3    | 5   | 131396478  | dominant  | -0.01 | (-0.04 to 0.03)  | 6.44E-01 | dominant  | 0.03  | (-0.01 to 0.06) | 1.23E-01 | dominant  | 0.03  | (-0.01 to 0.06) | 1.19E-01 | hetero                   | -0.01 | (-0.04 to 0.02)  | 5.86E-01 |
| rs13166954 | IL3    | 5   | 131396709  | NA        | NA    | NA               | NA       | NA        | NA    | NA              | NA       | NA        | NA    | NA              | NA       | NA                       | NA    | NA               |          |
| rs31481    | IL3    | 5   | 131397202  | additive  | -0.01 | (-0.03 to 0.02)  | 5.66E-01 | additive  | -0.02 | (-0.05 to 0)    | 8.05E-02 | dominant  | -0.02 | (-0.04 to 0.01) | 2.49E-01 | additive                 | -0.01 | (-0.04 to 0.02)  | 5.13E-01 |
| rs168681   | IL3    | 5   | 131402450  | hetero    | -0.01 | (-0.04 to 0.02)  | 4.34E-01 | recessive | 0.07  | (0.02 to 0.12)  | 3.61E-03 | additive  | 0.03  | (0.01 to 0.05)  | 8.42E-03 | recessive                | 0.07  | (0.01 to 0.12)   | 1.68E-02 |
| rs2069614  | CSF2   | 5   | 131407601  | hetero    | -0.03 | (-0.06 to 0)     | 2.66E-02 | additive  | 0.02  | (0 to 0.04)     | 6.43E-02 | additive  | 0.02  | (0 to 0.04)     | 1.37E-02 | hetero                   | -0.01 | (-0.05 to 0.02)  | 4.61E-01 |
| rs10072253 | CSF2   | 5   | 131409768  | NA        | NA    | NA               | NA       | NA        | NA    | NA              | NA       | NA        | NA    | NA              | NA       | NA                       | NA    | NA               |          |
| rs25882    | CSF2   | 5   | 131411460  | recessive | 0.03  | (-0.01 to 0.08)  | 1.54E-01 | hetero    | 0.03  | (0 to 0.06)     | 4.74E-02 | recessive | 0.03  | (-0.01 to 0.08) | 1.50E-01 | hetero                   | -0.01 | (-0.05 to 0.02)  | 3.91E-01 |
| rs25887    | CSF2   | 5   | 131416061  | dominant  | -0.01 | (-0.04 to 0.02)  | 5.66E-01 | additive  | -0.01 | (-0.03 to 0.01) | 3.01E-01 | recessive | 0     | (-0.03 to 0.04) | 8.02E-01 | additive                 | -0.01 | (-0.03 to 0.01)  | 4.47E-01 |
| rs3805685  | P4HA2  | 5   | 131528153  | recessive | -0.09 | (-0.21 to 0.03)  | 1.43E-01 | recessive | -0.13 | (-0.26 to 0)    | 5.85E-02 | hetero    | 0.02  | (-0.02 to 0.06) | 2.57E-01 | dominant                 | 0.01  | (-0.04 to 0.06)  | 7.62E-01 |
| rs156029   | P4HA2  | 5   | 131532634  | hetero    | -0.05 | (-0.07 to -0.02) | 9.68E-04 | hetero    | -0.03 | (-0.06 to 0)    | 5.64E-02 | dominant  | -0.02 | (-0.05 to 0.01) | 1.58E-01 | additive                 | -0.01 | (-0.03 to 0.01)  | 4.16E-01 |
| rs159903   | P4HA2  | 5   | 131540053  | recessive | 0.06  | (-0.01 to 0.13)  | 7.13E-02 | recessive | -0.06 | (-0.13 to 0.01) | 1.07E-01 | hetero    | -0.01 | (-0.04 to 0.01) | 3.42E-01 | recessive                | -0.03 | (-0.11 to 0.04)  | 3.82E-01 |
| rs11955347 | P4HA2  | 5   | 131567924  | recessive | -0.01 | (-0.05 to 0.04)  | 7.32E-01 | additive  | -0.02 | (-0.04 to 0.01) | 1.51E-01 | additive  | -0.01 | (-0.03 to 0.01) | 2.21E-01 | recessive                | -0.06 | (-0.12 to 0.01)  | 1.05E-01 |
| rs3900945  | PDLIM4 | 5   | 131592870  | dominant  | -0.01 | (-0.04 to 0.01)  | 3.40E-01 | recessive | 0.02  | (-0.02 to 0.06) | 3.97E-01 | dominant  | 0.02  | (-0.01 to 0.04) | 1.96E-01 | recessive                | -0.03 | (-0.07 to 0.01)  | 1.69E-01 |

|            |           |   |           |           |       |                  |          |           |       |                  |          |           |       |                  |          |           |       |                  |          |
|------------|-----------|---|-----------|-----------|-------|------------------|----------|-----------|-------|------------------|----------|-----------|-------|------------------|----------|-----------|-------|------------------|----------|
| rs10463891 | PDLIM4    | 5 | 131597392 | hetero    | -0.01 | (-0.04 to 0.02)  | 4.02E-01 | recessive | 0.03  | (-0.01 to 0.07)  | 1.82E-01 | additive  | 0.01  | (0 to 0.03)      | 1.30E-01 | recessive | -0.02 | (-0.07 to 0.02)  | 2.49E-01 |
| rs156112   | PDLIM4    | 5 | 131610232 | recessive | 0.09  | (0 to 0.19)      | 5.33E-02 | recessive | -0.1  | (-0.19 to 0)     | 4.36E-02 | dominant  | -0.02 | (-0.05 to 0.01)  | 1.64E-01 | recessive | -0.03 | (-0.13 to 0.07)  | 5.68E-01 |
| rs455649   | SLC22A4   | 5 | 131649306 | NA        | NA    | NA               | NA       | NA        | NA    | NA               | NA       | NA        | NA    | NA               | NA       | NA        | NA    | NA               | NA       |
| rs272893   | SLC22A4   | 5 | 131663062 | recessive | -0.02 | (-0.04 to 0.01)  | 2.63E-01 | additive  | -0.02 | (-0.04 to 0)     | 5.34E-02 | recessive | -0.02 | (-0.05 to 0)     | 6.87E-02 | recessive | -0.02 | (-0.05 to 0.02)  | 2.85E-01 |
| rs2304081  | SLC22A4   | 5 | 131667548 | hetero    | 0.02  | (-0.03 to 0.06)  | 5.13E-01 | recessive | 0.05  | (-0.19 to 0.29)  | 6.95E-01 | recessive | 0.19  | (-0.05 to 0.43)  | 1.21E-01 | additive  | -0.02 | (-0.08 to 0.03)  | 3.87E-01 |
| rs4646201  | SLC22A4   | 5 | 131671634 | NA        | NA    | NA               | NA       | NA        | NA    | NA               | NA       | NA        | NA    | NA               | NA       | NA        | NA    | NA               | NA       |
| rs272867   | SLC22A4   | 5 | 131681057 | recessive | -0.02 | (-0.05 to 0.01)  | 2.27E-01 | dominant  | -0.03 | (-0.07 to 0.01)  | 1.73E-01 | recessive | -0.02 | (-0.05 to 0)     | 8.37E-02 | recessive | -0.02 | (-0.05 to 0.02)  | 2.92E-01 |
| rs10040427 | SLC22A5   | 5 | 131714106 | recessive | 0.18  | (0.02 to 0.34)   | 2.64E-02 | dominant  | -0.02 | (-0.06 to 0.02)  | 3.35E-01 | hetero    | 0.01  | (-0.03 to 0.05)  | 6.22E-01 | recessive | -0.07 | (-0.25 to 0.11)  | 4.45E-01 |
| rs11568525 | SLC22A5   | 5 | 131729935 | hetero    | 0.02  | (-0.03 to 0.08)  | 4.02E-01 | additive  | -0.04 | (-0.09 to 0.02)  | 2.04E-01 | hetero    | -0.03 | (-0.08 to 0.02)  | 2.67E-01 | additive  | -0.03 | (-0.1 to 0.03)   | 2.82E-01 |
| rs7704457  | LOC441108 | 5 | 131744790 | recessive | -0.03 | (-0.1 to 0.04)   | 4.12E-01 | dominant  | 0.03  | (0 to 0.06)      | 7.28E-02 | hetero    | 0.02  | (0 to 0.05)      | 1.05E-01 | dominant  | 0.03  | (0 to 0.07)      | 4.73E-02 |
| rs6874639  | LOC441108 | 5 | 131778716 | hetero    | 0     | (-0.03 to 0.03)  | 8.80E-01 | additive  | 0.03  | (0.01 to 0.05)   | 7.72E-03 | additive  | 0.01  | (-0.01 to 0.03)  | 1.75E-01 | dominant  | 0.03  | (-0.01 to 0.06)  | 1.18E-01 |
| rs2522051  | LOC441108 | 5 | 131797578 | dominant  | -0.01 | (-0.04 to 0.03)  | 7.70E-01 | recessive | -0.06 | (-0.09 to -0.02) | 6.44E-04 | recessive | -0.01 | (-0.03 to 0.02)  | 6.57E-01 | dominant  | -0.04 | (-0.08 to 0)     | 7.48E-02 |
| rs2706379  | LOC441108 | 5 | 131805735 | dominant  | 0.01  | (-0.02 to 0.04)  | 5.04E-01 | additive  | 0.03  | (0.01 to 0.06)   | 3.46E-03 | additive  | 0.02  | (0 to 0.04)      | 1.08E-01 | recessive | 0.06  | (0.01 to 0.12)   | 3.04E-02 |
| rs2706381  | LOC441108 | 5 | 131810619 | additive  | 0.01  | (-0.01 to 0.03)  | 4.62E-01 | additive  | 0.03  | (0.01 to 0.05)   | 5.47E-03 | additive  | 0.02  | (0 to 0.04)      | 6.88E-02 | recessive | 0.06  | (0.01 to 0.12)   | 3.02E-02 |
| rs2070729  | IRF1      | 5 | 131819921 | dominant  | 0.01  | (-0.02 to 0.04)  | 5.46E-01 | hetero    | 0.01  | (-0.02 to 0.04)  | 5.41E-01 | hetero    | 0     | (-0.02 to 0.03)  | 7.26E-01 | recessive | 0.03  | (-0.03 to 0.08)  | 2.97E-01 |
| rs2070724  | IRF1      | 5 | 131822072 | recessive | 0.02  | (-0.02 to 0.05)  | 3.08E-01 | hetero    | 0.02  | (-0.01 to 0.05)  | 1.86E-01 | hetero    | 0.01  | (-0.01 to 0.04)  | 3.30E-01 | dominant  | 0.03  | (-0.01 to 0.06)  | 1.53E-01 |
| rs2070722  | IRF1      | 5 | 131824486 | recessive | 0.03  | (-0.01 to 0.06)  | 1.74E-01 | dominant  | 0.01  | (-0.02 to 0.05)  | 4.37E-01 | hetero    | 0.01  | (-0.01 to 0.04)  | 3.19E-01 | dominant  | 0.03  | (-0.01 to 0.06)  | 1.31E-01 |
| rs2706384  | IRF1      | 5 | 131826880 | recessive | 0.02  | (-0.01 to 0.06)  | 2.34E-01 | dominant  | 0.03  | (0 to 0.06)      | 3.10E-02 | hetero    | 0.03  | (0 to 0.05)      | 4.09E-02 | dominant  | 0.05  | (0.02 to 0.09)   | 4.75E-03 |
| rs2548999  | IRF1      | 5 | 131831058 | recessive | 0.03  | (-0.01 to 0.06)  | 1.67E-01 | hetero    | 0.03  | (0.01 to 0.06)   | 1.59E-02 | hetero    | 0.03  | (0.01 to 0.06)   | 1.84E-02 | dominant  | 0.04  | (0.01 to 0.08)   | 1.31E-02 |
| rs739718   | IL5       | 5 | 131873073 | hetero    | -0.02 | (-0.05 to 0.01)  | 1.80E-01 | hetero    | 0.01  | (-0.02 to 0.04)  | 4.34E-01 | recessive | -0.03 | (-0.07 to 0.02)  | 2.37E-01 | additive  | -0.02 | (-0.04 to 0.01)  | 2.61E-01 |
| rs2069818  | IL5       | 5 | 131877524 | recessive | -0.08 | (-0.29 to 0.14)  | 4.96E-01 | recessive | 0.17  | (-0.05 to 0.4)   | 1.32E-01 | additive  | 0.03  | (-0.01 to 0.07)  | 1.65E-01 | recessive | -0.06 | (-0.29 to 0.18)  | 6.38E-01 |
| rs4526098  | RAD50     | 5 | 131892979 | hetero    | 0.01  | (-0.02 to 0.04)  | 4.31E-01 | hetero    | 0.01  | (-0.02 to 0.05)  | 3.82E-01 | dominant  | 0.05  | (0 to 0.11)      | 7.35E-02 | additive  | -0.02 | (-0.05 to 0.01)  | 2.23E-01 |
| rs2706348  | RAD50     | 5 | 131905810 | recessive | -0.02 | (-0.06 to 0.02)  | 2.43E-01 | additive  | -0.01 | (-0.03 to 0.01)  | 3.80E-01 | additive  | -0.01 | (-0.03 to 0.01)  | 2.56E-01 | recessive | -0.05 | (-0.09 to -0.01) | 2.18E-02 |
| rs28903086 | RAD50     | 5 | 131915022 | hetero    | -0.62 | (-1.93 to 0.69)  | 3.54E-01 | hetero    | 0.57  | (-1.43 to 2.57)  | 5.77E-01 | hetero    | 0.85  | (-0.72 to 2.43)  | 2.87E-01 | hetero    | -1.2  | (-1.94 to -0.45) | 1.62E-03 |
| rs28903088 | RAD50     | 5 | 131915673 | NA        | NA    | NA               | NA       | NA        | NA    | NA               | NA       | NA        | NA    | NA               | NA       | NA        | NA    | NA               | NA       |
| rs10479007 | RAD50     | 5 | 131917726 | hetero    | 0.02  | (-0.02 to 0.05)  | 3.78E-01 | recessive | -0.07 | (-0.17 to 0.04)  | 2.34E-01 | recessive | -0.01 | (-0.1 to 0.09)   | 9.18E-01 | additive  | -0.01 | (-0.05 to 0.02)  | 4.94E-01 |
| rs28903092 | RAD50     | 5 | 131931472 | hetero    | -0.32 | (-0.68 to 0.04)  | 8.46E-02 | recessive | -0.36 | (-1.15 to 0.43)  | 3.76E-01 | recessive | -0.26 | (-1.14 to 0.62)  | 5.59E-01 | hetero    | 0.1   | (-0.09 to 0.3)   | 2.97E-01 |
| rs17772565 | RAD50     | 5 | 131952405 | additive  | -0.02 | (-0.05 to 0.01)  | 1.81E-01 | recessive | 0.07  | (-0.06 to 0.2)   | 3.07E-01 | recessive | 0.05  | (-0.07 to 0.16)  | 4.37E-01 | hetero    | -0.04 | (-0.08 to 0)     | 5.51E-02 |
| rs3798134  | RAD50     | 5 | 131965179 | additive  | 0.01  | (-0.01 to 0.03)  | 5.91E-01 | dominant  | 0.01  | (-0.02 to 0.04)  | 5.03E-01 | additive  | 0.02  | (0 to 0.04)      | 5.96E-02 | additive  | 0.02  | (-0.01 to 0.04)  | 1.42E-01 |
| rs4621555  | RAD50     | 5 | 131982808 | hetero    | 0.02  | (-0.02 to 0.06)  | 3.70E-01 | additive  | 0.03  | (-0.01 to 0.07)  | 1.08E-01 | dominant  | 0.09  | (-0.03 to 0.22)  | 1.43E-01 | additive  | 0.02  | (-0.02 to 0.06)  | 3.11E-01 |
| rs1881457  | IL13      | 5 | 131992409 | recessive | 0.03  | (-0.04 to 0.09)  | 4.37E-01 | additive  | 0.01  | (-0.01 to 0.04)  | 3.20E-01 | additive  | 0.02  | (-0.01 to 0.04)  | 1.40E-01 | additive  | 0.04  | (0.01 to 0.07)   | 9.25E-03 |
| rs2069744  | IL13      | 5 | 131994669 | dominant  | 0.02  | (-0.01 to 0.05)  | 1.85E-01 | hetero    | -0.01 | (-0.04 to 0.02)  | 6.20E-01 | dominant  | 0.03  | (0 to 0.06)      | 4.76E-02 | hetero    | 0     | (-0.03 to 0.04)  | 8.77E-01 |
| rs20541    | IL13      | 5 | 131995964 | dominant  | 0.02  | (-0.01 to 0.06)  | 1.24E-01 | additive  | 0.03  | (0 to 0.05)      | 5.03E-02 | dominant  | 0.02  | (-0.01 to 0.05)  | 2.00E-01 | hetero    | 0.05  | (0.01 to 0.08)   | 1.30E-02 |
| rs848      | IL13      | 5 | 131996500 | recessive | -0.01 | (-0.04 to 0.02)  | 5.15E-01 | dominant  | 0.02  | (-0.02 to 0.05)  | 2.89E-01 | hetero    | 0.01  | (-0.01 to 0.04)  | 3.11E-01 | dominant  | 0.02  | (-0.02 to 0.06)  | 2.26E-01 |
| rs2243206  | IL13      | 5 | 132001065 | recessive | -0.06 | (-0.19 to 0.06)  | 3.21E-01 | recessive | -0.16 | (-0.28 to -0.04) | 1.07E-02 | recessive | -0.12 | (-0.23 to -0.01) | 3.08E-02 | recessive | -0.11 | (-0.23 to 0.01)  | 7.32E-02 |
| rs2243248  | IL4       | 5 | 132008644 | hetero    | -0.04 | (-0.07 to -0.01) | 1.79E-02 | recessive | 0.04  | (-0.04 to 0.11)  | 3.31E-01 | additive  | 0.01  | (-0.01 to 0.03)  | 4.71E-01 | dominant  | 0.04  | (0 to 0.07)      | 4.79E-02 |
| rs2243250  | IL4       | 5 | 132009154 | hetero    | 0.01  | (-0.02 to 0.04)  | 4.33E-01 | dominant  | 0.05  | (0 to 0.09)      | 5.37E-02 | hetero    | 0.02  | (0 to 0.05)      | 8.50E-02 | hetero    | 0.02  | (-0.02 to 0.05)  | 2.81E-01 |
| rs2243251  | IL4       | 5 | 132009787 | hetero    | 0.03  | (0 to 0.06)      | 5.82E-02 | additive  | -0.01 | (-0.04 to 0.02)  | 4.94E-01 | recessive | -0.04 | (-0.11 to 0.03)  | 3.18E-01 | hetero    | 0.03  | (-0.01 to 0.07)  | 1.54E-01 |
| rs4986964  | IL4       | 5 | 132009821 | NA        | NA    | NA               | NA       | NA        | NA    | NA               | NA       | NA        | NA    | NA               | NA       | NA        | NA    | NA               | NA       |
| rs2243270  | IL4       | 5 | 132014109 | dominant  | 0.01  | (-0.02 to 0.04)  | 4.49E-01 | recessive | -0.02 | (-0.07 to 0.02)  | 3.38E-01 | additive  | 0     | (-0.02 to 0.02)  | 8.30E-01 | hetero    | 0.04  | (0 to 0.07)      | 3.24E-02 |
| rs2243283  | IL4       | 5 | 132016593 | recessive | 0.06  | (-0.01 to 0.14)  | 9.69E-02 | hetero    | 0.04  | (0.01 to 0.07)   | 1.67E-02 | recessive | -0.02 | (-0.09 to 0.05)  | 5.67E-01 | recessive | -0.04 | (-0.13 to 0.05)  | 3.74E-01 |
| rs3212227  | IL12B     | 5 | 158742950 | dominant  | 0.01  | (-0.02 to 0.04)  | 4.03E-01 | additive  | 0     | (-0.02 to 0.02)  | 7.54E-01 | dominant  | 0.02  | (-0.01 to 0.04)  | 2.00E-01 | dominant  | 0.03  | (0 to 0.06)      | 6.92E-02 |
| rs919766   | IL12B     | 5 | 158747564 | hetero    | -0.02 | (-0.05 to 0.01)  | 1.33E-01 | recessive | 0.05  | (-0.01 to 0.12)  | 1.27E-01 | additive  | -0.01 | (-0.03 to 0.01)  | 2.97E-01 | hetero    | -0.02 | (-0.05 to 0.02)  | 3.34E-01 |
| rs3181216  | IL12B     | 5 | 158752978 | additive  | -0.02 | (-0.05 to 0)     | 9.45E-02 | recessive | -0.05 | (-0.13 to 0.02)  | 1.82E-01 | additive  | -0.01 | (-0.03 to 0.02)  | 6.58E-01 | recessive | -0.03 | (-0.11 to 0.05)  | 4.71E-01 |
| rs730691   | IL12B     | 5 | 158756227 | hetero    | 0.01  | (-0.02 to 0.03)  | 7.01E-01 | dominant  | 0.02  | (-0.01 to 0.05)  | 2.82E-01 | recessive | -0.01 | (-0.02 to 0.05)  | 4.67E-01 | dominant  | 0.04  | (0.01 to 0.08)   | 2.24E-02 |
| rs2239704  | LTA       | 6 | 31540141  | hetero    | -0.03 | (-0.06 to 0)     | 3.36E-02 | recessive | 0.04  | (-0.02 to 0.1)   | 1.88E-01 | hetero    | -0.02 | (-0.05 to 0.01)  | 1.95E-01 | dominant  | -0.01 | (-0.04 to 0.03)  | 7.68E-01 |
| rs909253   | LTA       | 6 | 31540313  | recessive | 0.04  | (0.01 to 0.08)   | 7.07E-03 | recessive | 0.02  | (-0.01 to 0.05)  | 2.50E-01 | recessive | 0.03  | (0 to 0.06)      | 8.64E-02 | recessive | 0.06  | (0.04 to 0.1)    | 8.13E-03 |
| rs1799964  | TNF       | 6 | 31542308  | additive  | -0.01 | (-0.03 to 0.02)  | 5.67E-01 | recessive | -0.08 | (-0.13 to -      | 1.27E-02 | recessive | -0.02 | (-0.08 to 0.03)  | 4.52E-01 | dominant  | -0.04 | (-0.07 to -0.01) | 1.83E-02 |

|            |        |   |           |           |       |                  |          |           |       |                  |          |           |       |                  |          |           |       |                  |          |
|------------|--------|---|-----------|-----------|-------|------------------|----------|-----------|-------|------------------|----------|-----------|-------|------------------|----------|-----------|-------|------------------|----------|
|            |        |   |           |           |       |                  |          |           |       | 0.02)            |          |           |       |                  |          |           |       |                  |          |
| rs1800750  | TNF    | 6 | 31542963  | dominant  | 0.03  | (-0.03 to 0.1)   | 3.29E-01 | recessive | -0.07 | (-0.46 to 0.31)  | 7.08E-01 | hetero    | -0.05 | (-0.11 to 0.01)  | 1.13E-01 | hetero    | 0.02  | (-0.06 to 0.09)  | 6.71E-01 |
| rs1800629  | TNF    | 6 | 31543031  | hetero    | -0.04 | (-0.08 to 0)     | 3.10E-02 | hetero    | -0.02 | (-0.05 to 0.02)  | 3.68E-01 | recessive | 0.15  | (0.03 to 0.27)   | 1.40E-02 | recessive | 0.03  | (-0.11 to 0.16)  | 6.98E-01 |
| rs361525   | TNF    | 6 | 31543101  | recessive | -0.01 | (-0.15 to 0.14)  | 9.29E-01 | hetero    | -0.01 | (-0.05 to 0.03)  | 5.25E-01 | dominant  | -0.02 | (-0.05 to 0.02)  | 3.96E-01 | recessive | -0.1  | (-0.31 to 0.1)   | 3.10E-01 |
| rs3093662  | TNF    | 6 | 31544189  | hetero    | -0.02 | (-0.05 to 0.02)  | 3.65E-01 | hetero    | -0.01 | (-0.05 to 0.02)  | 4.45E-01 | dominant  | -0.02 | (-0.05 to 0.01)  | 2.54E-01 | hetero    | 0.01  | (-0.03 to 0.05)  | 6.48E-01 |
| rs2242665  | CTL4   | 6 | 31839309  | additive  | 0.02  | (0 to 0.04)      | 6.93E-02 | dominant  | 0.04  | (-0.02 to 0.09)  | 1.80E-01 | hetero    | -0.02 | (-0.05 to 0.01)  | 1.26E-01 | additive  | 0.02  | (-0.01 to 0.04)  | 1.41E-01 |
| rs1555498  | IL2ORA | 6 | 137325847 | dominant  | 0.03  | (0 to 0.06)      | 8.10E-02 | hetero    | 0.02  | (-0.01 to 0.05)  | 2.05E-01 | hetero    | 0.01  | (-0.01 to 0.04)  | 3.34E-01 | recessive | 0     | (-0.05 to 0.04)  | 8.99E-01 |
| rs11575936 | IFNGR1 | 6 | 137540425 | NA        | NA    | NA               | NA       | NA        | NA    | NA               | NA       | NA        | NA    | NA               | NA       | NA        | NA    | NA               | NA       |
| rs2075820  | NOD1   | 7 | 30492237  | recessive | -0.05 | (-0.09 to -0.01) | 1.73E-02 | recessive | 0.02  | (-0.02 to 0.06)  | 3.97E-01 | additive  | 0     | (-0.01 to 0.02)  | 6.38E-01 | recessive | 0.02  | (-0.03 to 0.06)  | 4.92E-01 |
| rs9942705  | GLI3   | 7 | 42445655  | recessive | 0     | (-0.06 to 0.06)  | 9.69E-01 | hetero    | -0.02 | (-0.05 to 0.01)  | 1.78E-01 | hetero    | -0.02 | (-0.05 to 0.01)  | 1.32E-01 | recessive | 0.08  | (0 to 0.15)      | 4.99E-02 |
| rs17172181 | HECW   | 7 | 43283115  | recessive | -0.02 | (-0.05 to 0.01)  | 1.40E-01 | additive  | -0.03 | (-0.05 to -0.01) | 8.53E-03 | additive  | -0.02 | (-0.04 to 0)     | 6.03E-02 | recessive | -0.02 | (-0.05 to 0.02)  | 3.53E-01 |
| rs17172184 | HECW   | 7 | 43286129  | recessive | -0.03 | (-0.07 to 0)     | 7.78E-02 | additive  | -0.02 | (-0.04 to 0)     | 4.13E-02 | additive  | -0.01 | (-0.03 to 0.01)  | 1.88E-01 | recessive | -0.03 | (-0.07 to 0.02)  | 2.25E-01 |
| rs7779749  | IZKF1  | 7 | 50418506  | dominant  | -0.04 | (-0.08 to 0)     | 6.40E-02 | hetero    | -0.01 | (-0.04 to 0.02)  | 7.10E-01 | hetero    | 0.02  | (-0.01 to 0.05)  | 1.16E-01 | dominant  | 0.02  | (-0.03 to 0.07)  | 4.07E-01 |
| rs10230385 | IZKF1  | 7 | 50452552  | dominant  | 0.01  | (-0.02 to 0.04)  | 4.24E-01 | additive  | 0.02  | (0 to 0.04)      | 5.64E-02 | dominant  | 0.01  | (-0.01 to 0.04)  | 3.59E-01 | recessive | -0.01 | (-0.06 to 0.03)  | 5.69E-01 |
| rs6964823  | IZKF1  | 7 | 50460096  | hetero    | 0.01  | (-0.02 to 0.04)  | 3.99E-01 | dominant  | -0.03 | (-0.06 to 0)     | 5.50E-02 | additive  | -0.02 | (-0.01 to 0.04)  | 3.66E-02 | recessive | 0.05  | (0 to 0.09)      | 3.44E-02 |
| rs4132601  | IZKF1  | 7 | 50470604  | hetero    | 0.02  | (-0.01 to 0.05)  | 2.48E-01 | hetero    | 0.02  | (-0.01 to 0.05)  | 2.35E-01 | dominant  | 0.03  | (0.01 to 0.06)   | 1.73E-02 | hetero    | -0.01 | (-0.05 to 0.02)  | 4.08E-01 |
| rs11980407 | IZKF1  | 7 | 50471613  | hetero    | 0.02  | (-0.01 to 0.05)  | 1.10E-01 | hetero    | 0.02  | (-0.01 to 0.05)  | 2.34E-01 | recessive | -0.03 | (-0.06 to 0)     | 3.30E-02 | hetero    | -0.02 | (-0.05 to 0.02)  | 3.37E-01 |
| rs6944602  | IZKF1  | 7 | 50473751  | recessive | -0.05 | (-0.19 to 0.1)   | 5.34E-01 | hetero    | 0     | (-0.04 to 0.05)  | 8.61E-01 | hetero    | 0.02  | (-0.02 to 0.06)  | 2.82E-01 | hetero    | -0.04 | (-0.09 to 0.01)  | 1.48E-01 |
| rs4947535  | DDC    | 7 | 50531681  | hetero    | 0.01  | (-0.01 to 0.04)  | 3.24E-01 | hetero    | -0.01 | (-0.04 to 0.02)  | 5.15E-01 | recessive | -0.01 | (-0.04 to 0.03)  | 6.68E-01 | dominant  | -0.03 | (-0.06 to 0.01)  | 1.09E-01 |
| rs11983581 | DDC    | 7 | 50532888  | hetero    | 0.02  | (-0.02 to 0.05)  | 3.04E-01 | dominant  | -0.07 | (-0.17 to 0.02)  | 1.37E-01 | dominant  | -0.04 | (-0.13 to 0.04)  | 3.27E-01 | dominant  | -0.03 | (-0.15 to 0.09)  | 5.95E-01 |
| rs11982772 | DDC    | 7 | 50533062  | hetero    | 0.02  | (-0.02 to 0.05)  | 2.90E-01 | recessive | 0.06  | (-0.03 to 0.16)  | 1.95E-01 | recessive | 0.04  | (-0.05 to 0.13)  | 3.51E-01 | hetero    | -0.01 | (-0.05 to 0.03)  | 7.13E-01 |
| rs11575527 | DDC    | 7 | 50534327  | hetero    | 0.02  | (-0.02 to 0.05)  | 3.31E-01 | recessive | 0.07  | (-0.02 to 0.17)  | 1.38E-01 | recessive | 0.04  | (-0.04 to 0.13)  | 3.28E-01 | hetero    | -0.01 | (-0.05 to 0.03)  | 7.14E-01 |
| rs11575522 | DDC    | 7 | 50535395  | hetero    | 0.02  | (-0.02 to 0.05)  | 3.59E-01 | recessive | 0.06  | (-0.04 to 0.16)  | 2.25E-01 | recessive | 0.04  | (-0.04 to 0.13)  | 3.15E-01 | hetero    | -0.01 | (-0.05 to 0.03)  | 6.26E-01 |
| rs11575518 | DDC    | 7 | 50535681  | hetero    | 0.02  | (-0.02 to 0.05)  | 3.09E-01 | dominant  | -0.07 | (-0.17 to 0.03)  | 1.51E-01 | dominant  | -0.04 | (-0.13 to 0.04)  | 3.30E-01 | hetero    | -0.01 | (-0.05 to 0.03)  | 6.86E-01 |
| rs11575483 | DDC    | 7 | 50544663  | recessive | 0.21  | (-0.22 to 0.63)  | 3.42E-01 | hetero    | -0.05 | (-0.12 to 0.01)  | 1.01E-01 | hetero    | -0.07 | (-0.13 to -0.01) | 2.56E-02 | hetero    | -0.02 | (-0.11 to 0.06)  | 5.83E-01 |
| rs11575387 | DDC    | 7 | 50567435  | dominant  | 0.04  | (0.01 to 0.07)   | 9.82E-03 | hetero    | -0.03 | (-0.06 to 0)     | 5.92E-02 | hetero    | -0.01 | (-0.04 to 0.02)  | 5.18E-01 | hetero    | -0.03 | (-0.07 to 0)     | 6.94E-02 |
| rs3779084  | DDC    | 7 | 50568735  | dominant  | 0.04  | (0.01 to 0.07)   | 1.42E-02 | hetero    | -0.03 | (-0.06 to 0)     | 9.18E-02 | dominant  | 0     | (-0.03 to 0.02)  | 7.85E-01 | hetero    | -0.02 | (-0.05 to 0.02)  | 2.96E-01 |
| rs880028   | DDC    | 7 | 50570136  | hetero    | 0.03  | (0 to 0.06)      | 8.35E-02 | hetero    | -0.04 | (-0.07 to -0.01) | 2.11E-02 | recessive | 0.01  | (-0.02 to 0.04)  | 4.92E-01 | additive  | 0     | (-0.02 to 0.03)  | 7.56E-01 |
| rs6592961  | DDC    | 7 | 50572890  | hetero    | 0.02  | (0 to 0.05)      | 8.72E-02 | recessive | 0.01  | (-0.02 to 0.04)  | 4.57E-01 | hetero    | 0.02  | (0 to 0.05)      | 1.12E-01 | hetero    | 0.03  | (-0.01 to 0.06)  | 1.09E-01 |
| rs7809758  | DDC    | 7 | 50573333  | hetero    | 0.03  | (0 to 0.06)      | 2.94E-02 | recessive | 0.01  | (-0.02 to 0.04)  | 4.19E-01 | hetero    | 0.02  | (-0.01 to 0.04)  | 2.17E-01 | hetero    | 0.01  | (-0.03 to 0.04)  | 6.87E-01 |
| rs1817074  | DDC    | 7 | 50574012  | hetero    | 0.02  | (-0.01 to 0.05)  | 1.75E-01 | additive  | 0.01  | (-0.01 to 0.03)  | 2.30E-01 | hetero    | 0.02  | (-0.01 to 0.04)  | 1.66E-01 | hetero    | 0.01  | (-0.02 to 0.04)  | 4.55E-01 |
| rs10271341 | DDC    | 7 | 50591583  | additive  | -0.01 | (-0.04 to 0.01)  | 3.60E-01 | hetero    | 0.01  | (-0.02 to 0.04)  | 4.21E-01 | hetero    | -0.01 | (-0.04 to 0.02)  | 3.82E-01 | additive  | -0.02 | (-0.05 to 0.01)  | 2.33E-01 |
| rs11575320 | DDC    | 7 | 50605298  | additive  | -0.01 | (-0.04 to 0.01)  | 3.64E-01 | dominant  | 0.01  | (-0.02 to 0.04)  | 6.62E-01 | dominant  | -0.02 | (-0.05 to 0)     | 1.00E-01 | dominant  | -0.03 | (-0.07 to 0)     | 8.58E-02 |
| rs3779074  | DDC    | 7 | 50612202  | recessive | -0.02 | (-0.06 to 0.01)  | 2.05E-01 | recessive | -0.03 | (-0.06 to 0.01)  | 1.56E-01 | recessive | -0.02 | (-0.05 to 0.01)  | 2.60E-01 | recessive | -0.05 | (-0.09 to -0.01) | 2.48E-02 |
| rs2044859  | DDC    | 7 | 50612562  | recessive | -0.02 | (-0.05 to 0.01)  | 2.58E-01 | recessive | -0.02 | (-0.06 to 0.01)  | 1.67E-01 | recessive | -0.02 | (-0.05 to 0.02)  | 3.35E-01 | recessive | -0.05 | (-0.09 to -0.01) | 2.77E-02 |
| rs2329371  | DDC    | 7 | 50615440  | hetero    | -0.02 | (-0.05 to 0.01)  | 2.78E-01 | recessive | 0.04  | (-0.03 to 0.11)  | 2.36E-01 | hetero    | -0.01 | (-0.04 to 0.02)  | 5.09E-01 | hetero    | -0.03 | (-0.06 to 0.01)  | 1.42E-01 |
| rs6956737  | DDC    | 7 | 50620781  | additive  | -0.02 | (-0.05 to 0.01)  | 1.18E-01 | hetero    | -0.02 | (-0.06 to 0.01)  | 2.05E-01 | additive  | -0.02 | (-0.04 to 0.01)  | 1.57E-01 | recessive | 0.06  | (-0.05 to 0.18)  | 2.82E-01 |
| rs1451375  | DDC    | 7 | 50622712  | hetero    | -0.02 | (-0.05 to 0.01)  | 2.70E-01 | additive  | 0.02  | (0 to 0.05)      | 6.88E-02 | recessive | 0.04  | (-0.02 to 0.11)  | 1.97E-01 | hetero    | -0.01 | (-0.04 to 0.02)  | 5.73E-01 |
| rs10249420 | DDC    | 7 | 50623451  | additive  | -0.01 | (-0.04 to 0.01)  | 3.48E-01 | hetero    | 0.03  | (0 to 0.06)      | 6.04E-02 | recessive | 0     | (-0.08 to 0.08)  | 9.76E-01 | recessive | -0.03 | (-0.12 to 0.06)  | 4.85E-01 |
| rs7803788  | DDC    | 7 | 50625898  | recessive | -0.03 | (-0.12 to 0.05)  | 4.64E-01 | hetero    | 0.03  | (0 to 0.06)      | 7.07E-02 | dominant  | 0.01  | (-0.02 to 0.04)  | 5.28E-01 | recessive | -0.05 | (-0.14 to 0.04)  | 2.85E-01 |
| rs6593010  | DDC    | 7 | 50629888  | hetero    | 0.02  | (0 to 0.05)      | 7.81E-02 | recessive | -0.04 | (-0.07 to -0.01) | 1.41E-02 | hetero    | 0.01  | (-0.02 to 0.04)  | 4.36E-01 | dominant  | 0.01  | (-0.03 to 0.06)  | 5.62E-01 |
| rs7800827  | DDC    | 7 | 50673171  | recessive | -0.1  | (-0.24 to 0.04)  | 1.69E-01 | recessive | 0.05  | (-0.09 to 0.19)  | 4.76E-01 | hetero    | 0     | (-0.04 to 0.03)  | 8.08E-01 | hetero    | 0.01  | (-0.04 to 0.06)  | 6.25E-01 |
| rs3211938  | CD36   | 7 | 80300449  | additive  | -0.03 | (-0.08 to 0.01)  | 1.68E-01 | additive  | -0.04 | (-0.08 to 0)     | 7.95E-02 | recessive | -0.24 | (-0.35 to -0.12) | 7.70E-05 | hetero    | 0.02  | (-0.03 to 0.07)  | 4.06E-01 |
| hcd36      | G1439C | 7 | 80302110  | hetero    | -0.14 | (-0.38 to 0.09)  | 2.38E-01 | hetero    | -0.07 | (-0.28 to 0.14)  | 5.25E-01 | hetero    | -0.07 | (-0.26 to 0.12)  | 4.59E-01 | hetero    | 0.01  | (-0.21 to 0.24)  | 8.97E-01 |
| rs17140229 | CFTR   | 7 | 117230283 | recessive | -0.02 | (-0.07 to 0.03)  | 3.98E-01 | hetero    | 0.03  | (0 to 0.06)      | 3.64E-02 | additive  | 0.01  | (-0.01 to 0.03)  | 4.57E-01 | additive  | 0.04  | (0.01 to 0.07)   | 2.58E-03 |

|            |         |    |           |           |       |                  |          |           |       |                  |          |           |       |                  |          |           |       |                  |          |
|------------|---------|----|-----------|-----------|-------|------------------|----------|-----------|-------|------------------|----------|-----------|-------|------------------|----------|-----------|-------|------------------|----------|
| rs4986790  | TLR4    | 9  | 120475302 | dominant  | -0.03 | (-0.06 to 0.01)  | 1.92E-01 | hetero    | -0.01 | (-0.05 to 0.03)  | 5.80E-01 | recessive | -0.06 | (-0.21 to 0.08)  | 3.87E-01 | additive  | -0.01 | (-0.05 to 0.03)  | 6.12E-01 |
| rs4986791  | TLR4    | 9  | 120475602 | recessive | 0.07  | (-0.25 to 0.39)  | 6.58E-01 | recessive | 0.23  | (-0.06 to 0.53)  | 1.25E-01 | recessive | 0.04  | (-0.26 to 0.33)  | 7.98E-01 | hetero    | 0.03  | (-0.05 to 0.11)  | 4.86E-01 |
| rs8176746  | ABO     | 9  | 136131322 | additive  | -0.03 | (-0.06 to 0)     | 2.41E-02 | hetero    | 0.01  | (-0.02 to 0.04)  | 6.02E-01 | recessive | -0.09 | (-0.17 to -0.01) | 3.09E-02 | additive  | -0.04 | (-0.07 to -0.01) | 1.26E-02 |
| rs8176719  | ABO     | 9  | 136132909 | hetero    | -0.01 | (-0.04 to 0.02)  | 3.76E-01 | hetero    | 0     | (-0.02 to 0.03)  | 7.45E-01 | dominant  | 0.03  | (-0.02 to 0.07)  | 2.26E-01 | dominant  | -0.02 | (-0.08 to 0.03)  | 3.87E-01 |
| rs334      | HBB     | 11 | 5248232   | additive  | -0.17 | (-0.24 to -0.11) | 2.94E-07 | hetero    | -0.15 | (-0.21 to -0.09) | 1.26E-06 | dominant  | -0.14 | (-0.2 to -0.09)  | 6.46E-07 | hetero    | -0.04 | (-0.09 to 0.02)  | 2.35E-01 |
| rs33930165 | HBB     | 11 | 5248233   | additive  | -0.02 | (-0.11 to 0.08)  | 7.14E-01 | recessive | 0.31  | (0.05 to 0.56)   | 1.83E-02 | recessive | 0.19  | (-0.04 to 0.42)  | 1.01E-01 | additive  | 0.09  | (0 to 0.18)      | 5.84E-02 |
| rs7935564  | TRIM5   | 11 | 5718517   | additive  | 0     | (-0.02 to 0.02)  | 7.91E-01 | additive  | -0.01 | (-0.03 to 0.01)  | 3.51E-01 | recessive | 0.01  | (-0.02 to 0.04)  | 4.87E-01 | hetero    | -0.03 | (-0.06 to 0)     | 5.87E-02 |
| rs569108   | MS4A2   | 11 | 59863104  | additive  | 0.02  | (-0.01 to 0.04)  | 1.57E-01 | additive  | 0.03  | (0 to 0.05)      | 4.50E-02 | hetero    | 0.02  | (-0.01 to 0.05)  | 1.64E-01 | additive  | 0.02  | (-0.01 to 0.05)  | 2.55E-01 |
| rs542998   | RTN3    | 11 | 63487386  | recessive | 0.04  | (0 to 0.07)      | 5.37E-02 | recessive | 0.06  | (0.03 to 0.1)    | 8.82E-04 | recessive | 0.04  | (0 to 0.07)      | 3.15E-02 | recessive | 0.04  | (0 to 0.08)      | 5.76E-02 |
| rs3024978  | STAT6   | 12 | 57490378  | hetero    | -0.53 | (-1.03 to -0.03) | 3.89E-02 | hetero    | -0.25 | (-0.67 to 0.18)  | 2.53E-01 | hetero    | -0.24 | (-0.69 to 0.22)  | 3.04E-01 | hetero    | -0.16 | (-0.47 to 0.15)  | 3.04E-01 |
| rs12314983 | STAT6   | 12 | 57492308  | additive  | -0.11 | (-0.26 to 0.03)  | 1.18E-01 | dominant  | -0.09 | (-0.23 to 0.06)  | 2.40E-01 | hetero    | -0.09 | (-0.22 to 0.04)  | 1.69E-01 | recessive | -0.45 | (-0.97 to 0.07)  | 8.84E-02 |
| rs35182390 | STAT6   | 12 | 57493602  | NA        | NA    | NA               | NA       | NA        | NA    | NA               | NA       | NA        | NA    | NA               | NA       | NA        | NA    | NA               | NA       |
| rs3024952  | STAT6   | 12 | 57500112  | NA        | NA    | NA               | NA       | NA        | NA    | NA               | NA       | NA        | NA    | NA               | NA       | NA        | NA    | NA               | NA       |
| rs2626577  | STAT6   | 12 | 57500509  | NA        | NA    | NA               | NA       | NA        | NA    | NA               | NA       | NA        | NA    | NA               | NA       | NA        | NA    | NA               | NA       |
| rs2069727  | IFNG    | 12 | 68548223  | additive  | -0.01 | (-0.04 to 0.01)  | 2.20E-01 | hetero    | -0.03 | (-0.06 to 0)     | 5.39E-02 | recessive | 0.02  | (-0.04 to 0.07)  | 5.56E-01 | hetero    | -0.01 | (-0.05 to 0.02)  | 4.70E-01 |
| rs2234687  | IFNG    | 12 | 68548756  | hetero    | 0.06  | (-0.46 to 0.58)  | 8.23E-01 | hetero    | -0.05 | (-0.51 to 0.4)   | 8.16E-01 | hetero    | 0.5   | (0.11 to 0.88)   | 1.22E-02 | hetero    | 0.11  | (-0.2 to 0.41)   | 4.85E-01 |
| rs2069718  | IFNG    | 12 | 68550162  | dominant  | 0     | (-0.02 to 0.03)  | 7.50E-01 | recessive | 0.03  | (-0.01 to 0.07)  | 1.04E-01 | recessive | 0.02  | (-0.02 to 0.05)  | 3.80E-01 | additive  | -0.01 | (-0.03 to 0.02)  | 6.01E-01 |
| rs1861493  | IFNG    | 12 | 68551196  | recessive | 0.05  | (-0.13 to 0.23)  | 5.89E-01 | additive  | 0.04  | (0 to 0.08)      | 3.50E-02 | dominant  | 0.01  | (-0.02 to 0.05)  | 4.57E-01 | hetero    | 0.05  | (0.01 to 0.1)    | 2.37E-02 |
| rs2069705  | IFNG    | 12 | 68555011  | dominant  | 0.03  | (0 to 0.07)      | 7.40E-02 | hetero    | 0.01  | (-0.02 to 0.04)  | 3.91E-01 | additive  | 0.01  | (-0.01 to 0.03)  | 3.48E-01 | hetero    | 0.03  | (0 to 0.06)      | 5.95E-02 |
| rs2227507  | IL22    | 12 | 68642647  | recessive | 0.12  | (-0.32 to 0.56)  | 5.92E-01 | additive  | -0.06 | (-0.12 to 0)     | 5.19E-02 | hetero    | -0.03 | (-0.08 to 0.03)  | 3.38E-01 | hetero    | -0.04 | (-0.11 to 0.03)  | 2.49E-01 |
| rs1012356  | IL22    | 12 | 68644618  | recessive | -0.02 | (-0.06 to 0.01)  | 1.45E-01 | additive  | 0.02  | (0 to 0.04)      | 1.09E-01 | dominant  | 0.03  | (0 to 0.05)      | 6.99E-02 | additive  | -0.01 | (-0.03 to 0.01)  | 3.58E-01 |
| rs2227491  | IL22    | 12 | 68646521  | hetero    | 0.01  | (-0.02 to 0.04)  | 5.38E-01 | recessive | 0.02  | (-0.01 to 0.05)  | 2.18E-01 | dominant  | 0.04  | (0 to 0.07)      | 2.55E-02 | hetero    | -0.01 | (-0.05 to 0.02)  | 3.66E-01 |
| rs2227485  | IL22    | 12 | 68647713  | recessive | -0.02 | (-0.05 to 0.02)  | 4.06E-01 | hetero    | -0.01 | (-0.04 to 0.01)  | 3.29E-01 | recessive | 0.02  | (-0.02 to 0.05)  | 3.38E-01 | recessive | -0.02 | (-0.06 to 0.02)  | 4.03E-01 |
| rs2227478  | IL22    | 12 | 68648622  | recessive | -0.03 | (-0.05 to 0)     | 6.78E-02 | additive  | 0     | (-0.03 to 0.02)  | 6.46E-01 | additive  | 0.01  | (-0.01 to 0.03)  | 2.17E-01 | hetero    | 0.01  | (-0.02 to 0.04)  | 5.55E-01 |
| rs229587   | SPTB    | 14 | 65263300  | hetero    | 0.02  | (-0.01 to 0.05)  | 1.62E-01 | hetero    | 0.02  | (-0.01 to 0.05)  | 1.35E-01 | recessive | -0.03 | (-0.07 to 0.01)  | 1.24E-01 | hetero    | -0.01 | (-0.04 to 0.03)  | 6.82E-01 |
| rs2230739  | ADCY9   | 16 | 4033436   | recessive | 0.08  | (-0.03 to 0.18)  | 1.43E-01 | hetero    | -0.04 | (-0.07 to 0)     | 4.81E-02 | recessive | 0.08  | (-0.01 to 0.17)  | 9.92E-02 | additive  | -0.03 | (-0.06 to 0)     | 8.95E-02 |
| rs10775349 | ADCY9   | 16 | 4079823   | hetero    | 0.01  | (-0.02 to 0.03)  | 7.28E-01 | hetero    | 0.01  | (-0.02 to 0.04)  | 6.83E-01 | dominant  | -0.01 | (-0.04 to 0.01)  | 3.73E-01 | dominant  | 0.03  | (-0.01 to 0.06)  | 1.66E-01 |
| rs1805015  | IL4R    | 16 | 27374180  | hetero    | -0.01 | (-0.04 to 0.02)  | 4.74E-01 | recessive | -0.01 | (-0.05 to 0.03)  | 6.52E-01 | recessive | 0.01  | (-0.02 to 0.05)  | 4.21E-01 | dominant  | -0.01 | (-0.05 to 0.02)  | 4.45E-01 |
| rs5470     | HP      | 16 | 72088421  | dominant  | -0.03 | (-0.07 to 0.01)  | 1.05E-01 | recessive | -0.04 | (-0.17 to 0.08)  | 4.81E-01 | hetero    | 0.02  | (-0.01 to 0.05)  | 2.46E-01 | dominant  | -0.03 | (-0.07 to 0.01)  | 1.94E-01 |
| rs2535611  | ADORA2B | 17 | 15861332  | dominant  | 0.02  | (-0.02 to 0.05)  | 3.68E-01 | hetero    | 0.02  | (-0.02 to 0.06)  | 4.16E-01 | additive  | 0.04  | (0.01 to 0.07)   | 1.85E-02 | recessive | 0.07  | (-0.11 to 0.26)  | 4.54E-01 |
| rs2297518  | NOS2    | 17 | 26096597  | recessive | -0.02 | (-0.1 to 0.06)   | 6.74E-01 | hetero    | 0.02  | (-0.01 to 0.05)  | 1.95E-01 | additive  | -0.01 | (-0.04 to 0.01)  | 2.54E-01 | recessive | -0.06 | (-0.17 to 0.06)  | 3.46E-01 |
| rs1800482  | NOS2    | 17 | 26128509  | recessive | 0.12  | (-0.12 to 0.36)  | 3.14E-01 | hetero    | 0.04  | (-0.01 to 0.09)  | 1.14E-01 | hetero    | 0.03  | (-0.01 to 0.08)  | 1.42E-01 | recessive | -0.16 | (-0.36 to 0.05)  | 1.33E-01 |
| rs2779249  | NOS2A   | 17 | 26128581  | additive  | 0.01  | (-0.01 to 0.03)  | 5.77E-01 | recessive | 0.01  | (-0.03 to 0.05)  | 5.06E-01 | recessive | 0.01  | (-0.02 to 0.05)  | 4.62E-01 | hetero    | 0.03  | (-0.01 to 0.06)  | 1.09E-01 |
| rs9282799  | NOS2    | 17 | 26128728  | recessive | -0.11 | (-0.38 to 0.16)  | 4.21E-01 | dominant  | -0.03 | (-0.08 to 0.02)  | 2.84E-01 | additive  | -0.03 | (-0.07 to 0.02)  | 1.95E-01 | hetero    | -0.04 | (-0.1 to 0.03)   | 2.51E-01 |
| rs8078340  | NOS2    | 17 | 26129212  | recessive | -0.06 | (-0.13 to 0)     | 5.70E-02 | recessive | -0.06 | (-0.12 to 0.01)  | 1.05E-01 | recessive | -0.03 | (-0.09 to 0.03)  | 3.31E-01 | recessive | -0.07 | (-0.15 to 0.01)  | 7.23E-02 |
| rs373533   | EMR1    | 19 | 6919624   | recessive | 0.02  | (-0.01 to 0.06)  | 1.57E-01 | recessive | -0.03 | (-0.06 to 0.01)  | 1.43E-01 | dominant  | 0.01  | (-0.02 to 0.04)  | 4.88E-01 | dominant  | -0.02 | (-0.05 to 0.02)  | 2.78E-01 |
| rs461645   | EMR1    | 19 | 6919753   | dominant  | -0.03 | (-0.06 to 0.01)  | 1.14E-01 | additive  | 0.02  | (0 to 0.04)      | 1.02E-01 | additive  | 0     | (-0.02 to 0.01)  | 6.45E-01 | recessive | 0.01  | (-0.02 to 0.05)  | 4.12E-01 |
| rs35825847 | FCER2   | 19 | 7754284   | dominant  | -0.5  | (-1.07 to 0.06)  | 8.16E-02 | additive  | -0.23 | (-0.55 to 0.1)   | 1.75E-01 | recessive | -0.49 | (-1.08 to 0.1)   | 1.05E-01 | hetero    | 0.65  | (-0.1 to 1.4)    | 8.75E-02 |
| rs1799969  | ICAM1   | 19 | 10394792  | hetero    | 0.02  | (-0.16 to 0.21)  | 8.10E-01 | hetero    | 0.09  | (-0.07 to 0.26)  | 2.67E-01 | hetero    | 0.03  | (-0.13 to 0.19)  | 7.08E-01 | hetero    | 0.03  | (-0.11 to 0.18)  | 6.47E-01 |
| rs5498     | ICAM1   | 19 | 10395683  | additive  | 0.03  | (0 to 0.06)      | 3.88E-02 | recessive | 0.07  | (0 to 0.15)      | 5.10E-02 | recessive | 0.03  | (-0.04 to 0.11)  | 3.53E-01 | dominant  | 0.05  | (0.01 to 0.09)   | 9.84E-03 |
| rs8386     | GNAS    | 20 | 57485812  | recessive | -0.02 | (-0.1 to 0.07)   | 6.86E-01 | dominant  | 0.02  | (-0.01 to 0.06)  | 1.64E-01 | additive  | 0.01  | (-0.02 to 0.04)  | 4.57E-01 | recessive | 0.05  | (-0.05 to 0.15)  | 3.55E-01 |
| rs1128127  | DERL3   | 22 | 24179132  | hetero    | 0.01  | (-0.02 to 0.03)  | 5.92E-01 | dominant  | 0.01  | (-0.02 to 0.04)  | 4.99E-01 | dominant  | 0.02  | (-0.01 to 0.05)  | 1.63E-01 | additive  | 0.02  | (0 to 0.05)      | 5.05E-02 |
